# 1 Large-scale discovery of candidate type VI secretion effectors 2 with antibacterial activity 3

4 Alexander Martin Geller<sup>1,\*</sup>, David Zlotkin<sup>1,\*</sup>, and Asaf Levy<sup>1,♀</sup>

5 <sup>1</sup> Department of Plant Pathology and Microbiology, the Robert H. Smith Faculty of Food and  
6 Environment, the Hebrew University of Jerusalem, Rehovot, Israel.

7 ♀ Corresponding author, email: [alevy@mail.huji.ac.il](mailto:alevy@mail.huji.ac.il)

8 \* The authors contributed equally to this work

9

## 10 **Abstract**

11

12 Type VI secretion systems (T6SS) are common bacterial contractile injection systems  
13 that inject toxic “effector” proteins into neighboring cells. Effector discovery is generally  
14 done manually, and computational approaches used for effector discovery depend on  
15 genetic linkage to T6SS genes and/or sequence similarity to known effectors. We  
16 bioinformatically investigated T6SS in more than 11,832 genomes of Gram negative  
17 bacteria. We found that T6SS encoding bacteria are host-associated and pathogenic,  
18 enriched in specific human and plant tissues, while depleted in marine, soil, and  
19 engineered environments. Analysis of T6SS cores with C-terminal domains (“evolved”  
20 cores) showed “evolved” HCP are rare, overwhelmingly encoded in orphan operons,  
21 and are largely restricted to *Escherichia*. Using the wealth of data generated from our  
22 bioinformatic analysis, we developed two algorithms for large-scale discovery of T6SS  
23 effector proteins (T6Es). We experimentally validated ten putative antibacterial T6SS  
24 effector proteins and one cognate immunity gene from a diverse species. This study  
25 provides a systematic genomic perspective of the role of the T6SS in nature, a thorough  
26 analysis of T6E evolution and genomic properties, and discovery of a large number of  
27 candidate T6Es using new approaches.

28

## 29 **Introduction**

30 Microbes utilize various antagonistic mechanisms to infect hosts and to kill competing  
31 microbes. The type VI secretion system (T6SS) is a membrane-bound, contact-

32 dependent secretion system that injects toxic T6SS effector proteins (T6Es) into  
33 neighbouring bacteria and into eukaryotic cells (Cianfanelli, Monlezun, and Coulthurst  
34 2016; Pukatzki et al. 2006). Structurally, the T6SS is a contractile injection system,  
35 which shoots a spear-like structure towards neighboring cells. The “spearhead” and  
36 “shaft of the spear” are secreted from the attacking cell (Vettiger and Basler 2016). The  
37 “spearhead” is made up of a protein called PAAR, and a trimer of VgrG, while the shaft  
38 is made up of a column of hollow, donut-like structures, formed from stacks of hexamers  
39 of the protein HCP (Jing Wang, Brodmann, and Basler 2019).

40 T6Es are oftentimes proteins that non-covalently interact with HCP, VgrG, or PAAR,  
41 and are thereby secreted into target cells upon T6SS contraction. These are sometimes  
42 called “cargo” effectors (Alcoforado Diniz, Liu, and Coulthurst 2015). However,  
43 sometimes the HCP, VgrG, and PAAR proteins (“core proteins”) contain an N-terminal  
44 core domain, e.g. a VgrG domain, and a C-terminal toxin domain, e.g. an enzymatic  
45 actin crosslinking domain. This example of an “evolved” VgrG exists in *Vibrio cholerae*  
46 (Pukatzki et al. 2007). Core proteins with C-terminal domains are called “evolved” cores  
47 (e.g. “evolved” PAAR). “Evolved” cores are also sometimes referred to as “specialized  
48 effectors” (Alcoforado Diniz, Liu, and Coulthurst 2015). Other examples of “evolved”  
49 core effectors include VgrG-3 of *Vibrio cholerae*, which has a C-terminal peptidoglycan  
50 degrading activity (Brooks et al. 2013), VgrG2B of *Pseudomonas aeruginosa*, which has  
51 a C-terminal metallopeptidase activity (Wood et al. 2019), HCP-ET1, which has a C-  
52 terminal nuclease domain (Ma, Pan, et al. 2017), and Tse6 of *P. aeruginosa* has an N-  
53 terminal PAAR with a C-terminal toxin (Whitney et al. 2015; Quentin et al. 2018).

54 “Evolved” cores are of interest, yet there has not been a comprehensive study of them.  
55 There have, however, been studies of the T6SS operons as a whole bioinformatically.  
56 One was published 13 years ago, and used 400 genomes for a first genomic look at the  
57 T6SS (Bingle, Bailey, and Pallen 2008). The authors concluded that the T6SS is  
58 present in more than a quarter of sequenced bacterial genomes. Furthermore, they  
59 showed that the T6SS is mostly present in Proteobacteria (Bingle, Bailey, and Pallen  
60 2008). Another bioinformatic study used 501 prokaryotic genomes to compare and  
61 contrast T6SS genes and operons found in these genomes (Boyer et al. 2009). Boyer et

62 al. found that taxonomically, the T6SS is present largely in Proteobacteria. Other  
63 bioinformatic studies of the T6SS generally focus on a specific taxonomic subgroup  
64 (Repizo et al. 2019; Robinson et al. 2021), and to the best of our knowledge, no broad  
65 T6SS bioinformatic analysis has been published recently, despite the precipitous rise of  
66 the availability of genomic sequencing data and the growing understanding of T6SS  
67 importance in shaping microbial interactions with host and microbe.

68  
69 T6SS and its T6Es are not only important to microbial ecology (i.e., their highly  
70 important role in niche colonization) and pathogen-host interaction (Speare et al. 2018;  
71 Logan et al. 2018; Dörr and Blokesch 2018) but also to application as potential new  
72 antimicrobials, to medicine and to agriculture. For example, study of T6Es highlights  
73 novel bacterial antimicrobial targets. The recent study of T6E Tse8 showed that  
74 inhibition of transamidosome activity has antibacterial activity (Nolan et al. 2021). This  
75 knowledge can lead to development of new antimicrobials that inhibit the  
76 transamidosome, a novel target, to treat infectious diseases. Therefore, it is important  
77 scientifically and practically to investigate and discover diverse T6Es. Despite this  
78 importance, a recent survey screened Proteobacterial genomes that contain T6SS  
79 genes and found that only 42% had effectors of known activity, which suggests a large  
80 portion of effectors remain undiscovered or their mechanisms of action are yet unknown  
81 (LaCourse et al. 2018).

82  
83 Generally, T6Es have been discovered in specific model organisms by looking at  
84 genetic linkage, i.e. functionally screening genes that are encoded near the T6SS core  
85 genes for toxic activity (Lien and Lai 2017). This approach is effective, but is inefficient,  
86 and may miss toxins that are not genetically linked to the core components of the T6SS,  
87 i.e. “orphan” or “auxilliary” operons, which are far from the T6SS core operon (Crisan et  
88 al. 2019). There is also the possibility that there are “super orphan” operons, i.e. T6E  
89 genes located in the genomes distantly from any T6SS core genes. Indeed, our group  
90 identified one putative T6E family that had no close genetic linkage to known T6SS  
91 genes (Levy et al. 2017). Another method to discover T6Es are experimental screens

92 (Lien and Lai 2017), but this method has limited scalability, as it requires growth and  
93 mutation of the species of interest.

94

95 An alternative method to identify T6Es is to use bioinformatic approaches to mine the  
96 wealth of prokaryotic genome sequencing data currently available publicly. Past studies  
97 that have used computational approaches to search for new effector genes have relied  
98 on algorithms that use 3D protein modelling homology to known enzymatic activities as  
99 parameters. The Mougous group has successfully identified a peptidoglycan amidase  
100 T6E superfamily using an algorithm that filtered hits for potential amidase activity by  
101 protein modelling (Russell et al. 2012), and subsequently used a similar algorithm to  
102 search for putative lipase and lysozyme activity, respectively (Whitney et al. 2013;  
103 Russell et al. 2013). Another bioinformatic approach used to discover new T6Es was a  
104 sequence homology based algorithm, which identified a conserved amino acid  
105 sequence motif called the MIX domain that was present in a variety of T6SS effectors  
106 (Salomon et al. 2014). A machine learning approach was taken to identify putative  
107 T6Es, but the authors did not validate their computational predictions (Jiawei Wang et  
108 al. 2018).

109

110 A powerful predictive algorithm could be designed that relies on the adaptor proteins of  
111 the T6SS (also called “chaperone” proteins). Adaptor proteins in the T6SS context  
112 refers to proteins that facilitate the proper folding and loading of their partner toxic  
113 effectors onto the T6SS (Unterweger et al. 2015). For example, Tap-1/TEC, an adaptor  
114 of a T6SS in *V. cholerae*, was discovered by two separate groups as a chaperone  
115 protein that facilitates the loading of a toxic effector onto the T6SS, but is not secreted  
116 itself (Unterweger et al. 2015; Unterweger, Kostiuk, and Pukatzki 2017; Liang, Moore,  
117 and Wilton 2015). The major families of adaptors studied to date, which contain the  
118 conserved domains DUF4123, DUF1795, and DUF2169, all share the feature of being  
119 genetically linked to their corresponding effector (Unterweger, Kostiuk, and Pukatzki  
120 2017).

121

122 In this study, we perform a broad scale bioinformatic analysis on 11,832 T6SS-encoding  
123 genomes, with a special focus on “evolved” HCP, VgrG, and PAAR. We explore the  
124 characteristics of “evolved” cores, and we also use this information to discover novel  
125 putative T6Es with two distinct algorithmic approaches. We used these algorithms to  
126 perform a massive discovery of T6Es in thousands of bacterial genomes and validate  
127 their toxicity. We discovered 10 putative T6Es that were found to cause toxicity to *E.*  
128 *coli*, some of which are “super orphans”, i.e. far from any core T6SS genes. Our  
129 methodology for large scale prediction and screening is in contrast to the majority of  
130 T6SS studies, which mostly focus on discovery of a single effector in a single species,  
131 and provides an alternative way for discovery of T6SS effectors.

132

## 133 **Results**

134

### 135 **T6SS-encoding genomes make up 19% of all sequenced bacteria**

136 Using conserved domains of the T6SS (Materials and Methods), we found 11,832  
137 genomes with T6SS (Figure 1A, Supplementary Data 1) out of a total 62,075 genomes  
138 that we download from the IMG bacterial genome database (I.-M. A. Chen et al. 2019),  
139 which represents 19% of the database. Like previous studies (Boyer et al. 2009), we  
140 see that the T6SS in our dataset are mainly encoded by Proteobacteria, and  
141 overwhelmingly by Gamma- and Betaproteobacteria (85.5% and 11% of all T6SS-  
142 encoding genomes respectively; Figure 1B). In contrast, we saw there is a depletion for  
143 Alpha-, Delta-, and Epsilonproteobacteria (Figure 1B). Looking at the enrichment of  
144 T6SS at the genus level, we see a T6SS enrichment in well-studied  
145 Gammaproteobacterial genera, such as *Yersinia*, *Klebsiella*, *Proteus*, *Pseudomonas*,  
146 *Vibrio*, *Serratia*, *Escherichia*, *Salmonella* (Figure 1B). Interestingly, the genus *Shigella*  
147 seems like an outlier within the Enterobacteriaceae family. Its related genera are T6SS-  
148 rich, including *Escherichia*, *Klebsiella*, *Chronobacter*, *Citrobacter*, and *Salmonella*,  
149 whereas *Shigella* is for some reason T6SS-poor, and might be using an alternative  
150 predominant molecular weapon although T6SS in certain *Shigella* species has been  
151 reported (Anderson et al. 2017). The genus with the largest enrichment of T6SS was  
152 *Aliivibrio*. This is unsurprising, as it is known that *Aliivibrio fischeri* (*Vibrio fischeri*) uses

153 its T6SS as a critical factor that determines squid light organ niche colonization in a  
 154 competitive environment (Speare et al. 2018). *Yersinia* also was highly enriched for  
 155 T6SS, with 96% of sequenced species (428/445) encoding the T6SS marker genes,  
 156 which is expected given the T6SS's role in virulence, competition, and ion transport  
 157 (Yang et al. 2018). We note that our dataset overwhelmingly seems to contain T6SS  
 158 subtype i, with a handful of Genera known to harbor subtype ii. This is likely because  
 159 the conserved domains used for search were likely based on subtype i and ii marker  
 160 domains (Materials and Methods), and likely do not detect more distant subtype iii and  
 161 iv T6SS.

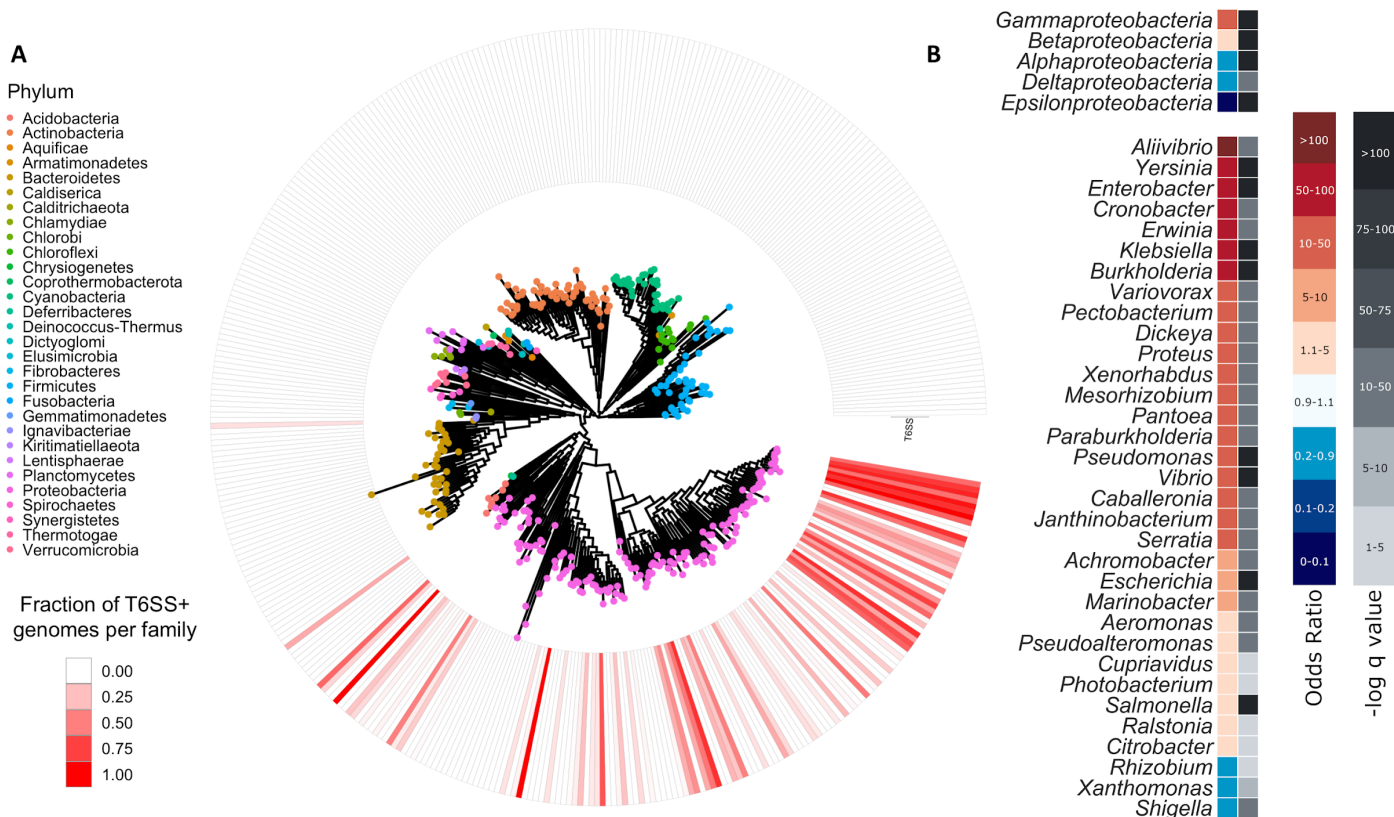

162  
 163 **Figure 1. T6SS Genome distribution and enrichment.** (A) Phylogenetic tree of taxonomic  
 164 Families in our database (each leaf represents one Family), with percentage of the members of  
 165 each Family encoding T6SSs (ring of red shades). Colors on leaves represent Phylum. (B)  
 166 Statistical enrichment (redder colors) and depletion (bluer colors) of Classes (top) and Genera  
 167 (bottom) encoding T6SS. Enrichment was calculated using Fisher exact test, and corrected with  
 168 Benjamini Hochberg method to produce q-value (plotted as  $-\log_{10}$  q value in grey).  
 169

170 **T6SS-encoding bacteria live a pathogenic lifestyle and are enriched in specific**  
171 **tissues of humans and plants**

172 We noted that members of these well-studied Genera are of such interest to science in  
173 part because they are known for containing pathogenic species. In order to  
174 quantitatively understand the lifestyle and environments of T6SS-encoding bacteria, we  
175 performed an enrichment analysis of their genome metadata. The metadata includes  
176 features about the isolation site and lifestyle of the sequenced microbe. This analysis is  
177 statistically corrected for biases in the genomic data (I.-M. A. Chen et al. 2017, 2019;  
178 Brynildsrud et al. 2016) (see Materials and Methods). Our analysis showed that T6SS-  
179 encoding genomes are indeed mildly enriched for pathogenic lifestyle (odds ratio [OR] =  
180 1.268, q-value = 0.0194; Figure 2; Supplementary Data 2). T6SS-encoding bacteria are  
181 enriched in eukaryotic hosts (OR = 4.06); specifically they are enriched in humans (OR  
182 = 2.42), cattle (OR = 2.16), and plants (OR = 2.99) (Figure 2). Within humans, T6SS is  
183 enriched in microbes isolated from the digestive system (OR = 1.69), the excretory  
184 system (OR = 3.16), the urethra (OR = 3.78), and from feces (OR = 5.92). T6SS is,  
185 however, depleted from microbes isolated from the reproductive system (OR = 0.09)  
186 and from subgingival plaques (OR = 0). In plants, T6SS is strongly enriched in  
187 endophytes, which are isolated from the plant interior (OR = 35.5), and from the  
188 rhizoplane (root surface) (OR = 5.71). Previous findings showed that T6SS is indeed  
189 important for root colonization of certain bacteria (Mosquito et al. 2020). Furthermore,  
190 we see T6SS-encoding genomes are statistically depleted from aquatic (OR = 0.218),  
191 marine (OR = 0.251), soil (OR = 0.509), and environmental sources generally (OR =  
192 0.264), and also from engineered environments (OR = 0.462), such as activated sludge  
193 (OR = 0.164) and bioreactors (OR = 0.09) (Figure 2). Therefore, T6SS can be described  
194 as a host-associated microbial toxin secretion system, although not present in all hosts  
195 (e.g., T6SS is depleted from bacteria isolated algae). When analyzing the physiological  
196 lifestyle of T6SS-encoding bacteria, we observed that T6SS is enriched in motile (OR =  
197 16.7), mesophilic (OR = 3.42), nitrogen fixing (OR = 7.85) bacteria and is depleted from  
198 anaerobic bacteria (OR = 0.026) and from bacteria that dwell in radical temperatures.  
199 As expected, we detect that T6SS is a feature of Gram negative bacteria and is  
200 depleted from Gram positive bacteria (Figure 2, Supplementary Data 2).

201

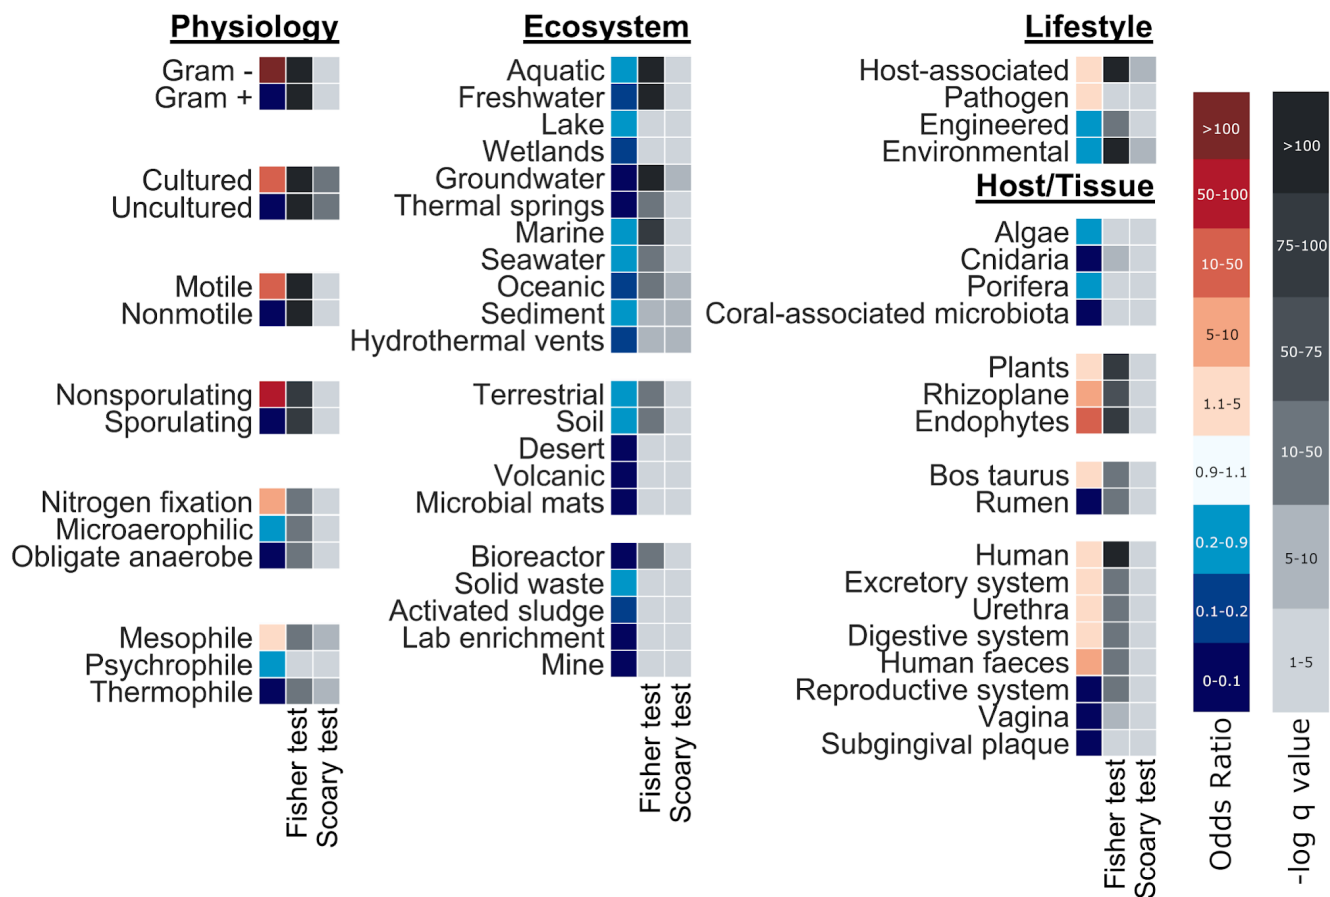

202

203 **Figure 2. Metadata enrichment of T6SS-encoding genomes.** Metadata of T6SS-encoding  
 204 genomes were analyzed using Scoary (Brynilsdrud et al. 2016). The analysis assigns an odds  
 205 ratio that quantifies the enrichment (redder) or depletion (bluer) of metadata labels using a  
 206 Fisher exact test. Importantly, Scoary also takes into account phylogeny to correct for  
 207 taxonomic biases that exist in our genome database. Therefore, we have statistical significance  
 208 for both the naive Fisher exact test (middle columns) and for the phylogeny-aware Scoary test  
 209 (right columns), displayed as a  $-\log_{10}$  of the q-values.

210

211 **“Evolved” HCP are narrowly taxonomically distributed, smaller, and have limited**  
 212 **effector repertoires compared to other “evolved” cores**

213 One of the most intriguing aspects of the T6SS are its toxic T6SS effector proteins  
 214 (T6Es). To be secreted from the attacking cell into neighboring cells, the toxic T6E  
 215 proteins are non-covalently or covalently attached to the T6SS machinery. The latter are  
 216 called “evolved” cores. The covalently bound “evolved” T6Es roughly follow a



217 polymorphic toxin architecture, with an N-terminal trafficking domain, and a C-terminal  
218 toxin domain (Zhang et al. 2012). In the case of T6SS, the N-terminal trafficking  
219 domains are components of the core machinery: VgrG (Spike component), PAAR (Tip  
220 of the spike), or HCP (tube component) (Figure 3A). The C-termini many times are  
221 enzymes, and we report their overall characteristics in the following paragraphs.  
222

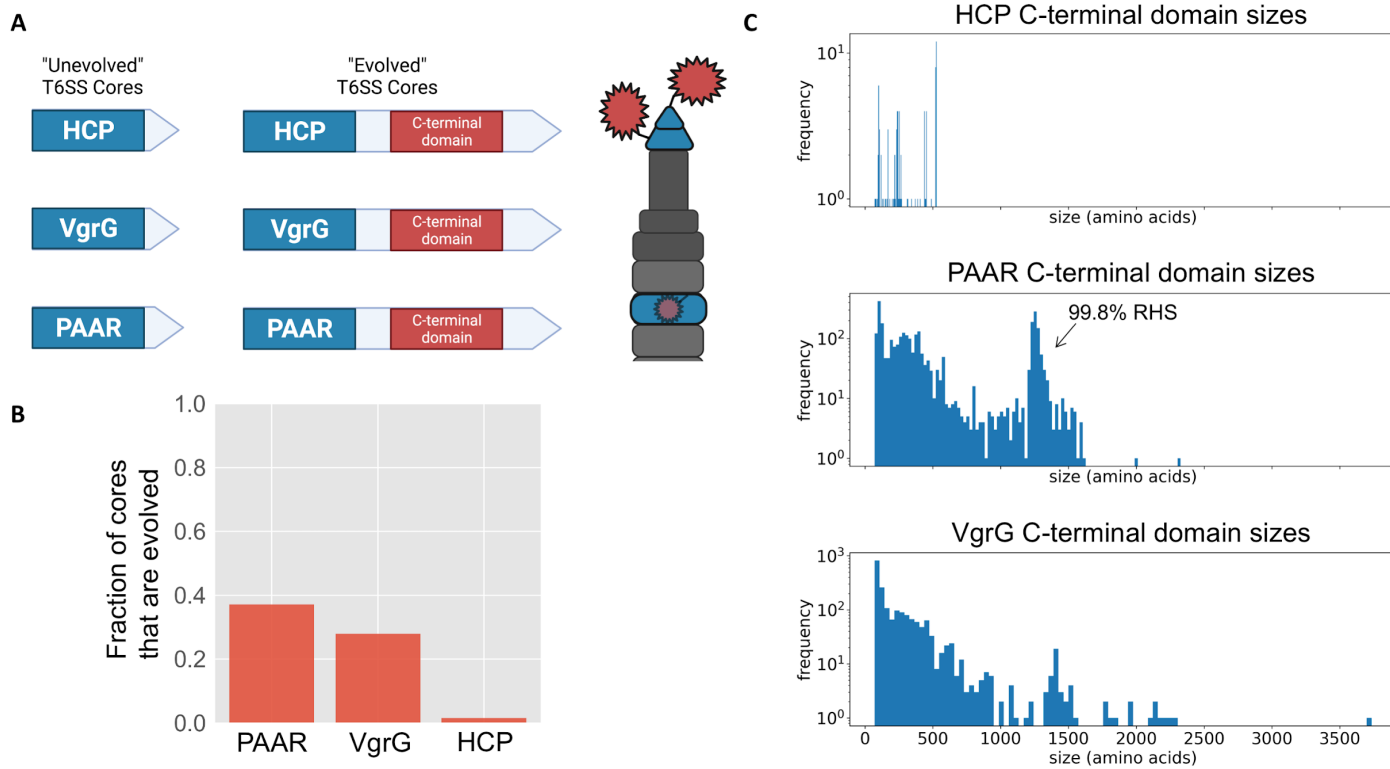

223

224 **Figure 3. "Evolved" T6SS cores prevalence and sizes.** (A) Cartoon of "unevolved" (left) vs.  
225 "evolved" T6SS core proteins (middle). "Evolved" cores have a C-terminal domain, which many  
226 times is an enzymatic toxic domain, which is inherently loaded onto the T6SS structure, due to  
227 the N-terminal core domain (right). (B) Fraction of cores which are "evolved". (C) Histogram of  
228 sizes of C-terminal extensions of HCP, PAAR, and VgrG.

229

230

231 Using our dataset of T6SS cores (Supplementary Data 3), we asked what proportion of  
232 cores are "evolved", i.e. have a C-terminal domain. While it is common for PAAR and  
233 VgrG to be "evolved" (38.48% and 26.40% have C-terminal domains, respectively),  
234 HCP only quite rarely has "evolved" versions, with only 2.07% of HCP having a C-

235 terminal domain (Figure 3B). We speculate that it may be evolutionarily challenging to fit  
236 functional toxic effectors into the small, donut-shaped HCP hexamer for proper  
237 packaging, assembly, and delivery. In order to explore whether size constraint may play  
238 a role in “evolved” cores, we plotted the sizes of the C-terminal extensions of HCP,  
239 VgrG, and PAAR (Figure 3C). HCP has the smallest range of C-terminal domains  
240 (between 71 and 528 amino acids, median size 253 amino acids). The vast majority of  
241 VgrG C-termini are also less than 500 amino acids (median size 135 amino acids), yet  
242 we see some outliers of larger size, up to a maximum of 3663 amino acids. The C-  
243 terminal domains of PAAR has a bimodal size distribution, with one group of effector  
244 domains less than 500 amino acids, and another large group of 1200-1400 amino acids.  
245 This latter group of large effector domains are virtually all annotated as RHS domains,  
246 which are large domains that are found in nature to have a variety of C-terminal toxins  
247 (Ma, Sun, et al. 2017; Jamet and Nassif 2015) (Figure 3).

248  
249 We sought to understand how the “evolved” T6SS cores are distributed taxonomically,  
250 in order to determine if there is a bias in the distribution of certain “evolved” cores by a  
251 given taxonomic group. Strikingly, we can see that “evolved” HCP seem to be  
252 overwhelmingly restricted to *Escherichia* (Figure 4A, 10 o’clock to 1 o’clock), which  
253 represents 91.4% (1702/1861) of all genomes with “evolved” HCP. This refines our  
254 previously mentioned result: “evolved” HCP is scarce, perhaps because it is narrowly  
255 distributed taxonomically, and likely appeared only once in an *Escherichia* ancestor.  
256 *Salmonella* species seem to have a strong bias towards using mostly “evolved” PAAR  
257 (Figure 4A, 1 o’clock to 2 o’clock). Interestingly, *Vibrio* is split into two subpopulations:  
258 one that largely uses only “evolved” VgrG, and another subpopulation that only uses  
259 “evolved” PAAR (Figure 4A, 4 o’clock to 5 o’clock). The subpopulation that uses only  
260 “evolved” VgrG is largely made up of *V. cholerae* (83% of those with “evolved” VgrG  
261 only), and the subpopulation that encodes only for “evolved” PAAR is largely made up  
262 of *V. parahaemolyticus* (60.78%). We speculate these taxonomic biases may have to do  
263 with the fact that these effectors have an N-terminal core domain that needs to be  
264 compatible with the underlying T6SS core machinery in order to be loaded and fired.  
265 We then asked if it was possible for a genome to encode a T6SS with strictly “evolved”

266 cores, i.e. is it possible to build a T6SS without “regular” cores. We found that virtually  
267 no genomes have strictly “evolved” cores (0.4%; 55/11752). Yet, 77% (9087/11752) of  
268 genomes contain at least one “evolved” core, showing their extensive utility as part of  
269 T6SS function. Looking closer, it is rare to find genomes with strictly “evolved” HCP  
270 (0.5%; 63/11289) or strictly “evolved” VgrG (7%; 752/10663), yet it is relatively common  
271 to find genomes with all PAAR being “evolved” (27.2%; 2777/10180). This suggests that  
272 “evolved” PAAR does not affect efficiency of T6SS assembly, while “evolved” VgrG  
273 trimers and “evolved” HCP hexamers may have some cost to T6SS functionality.  
274  
275

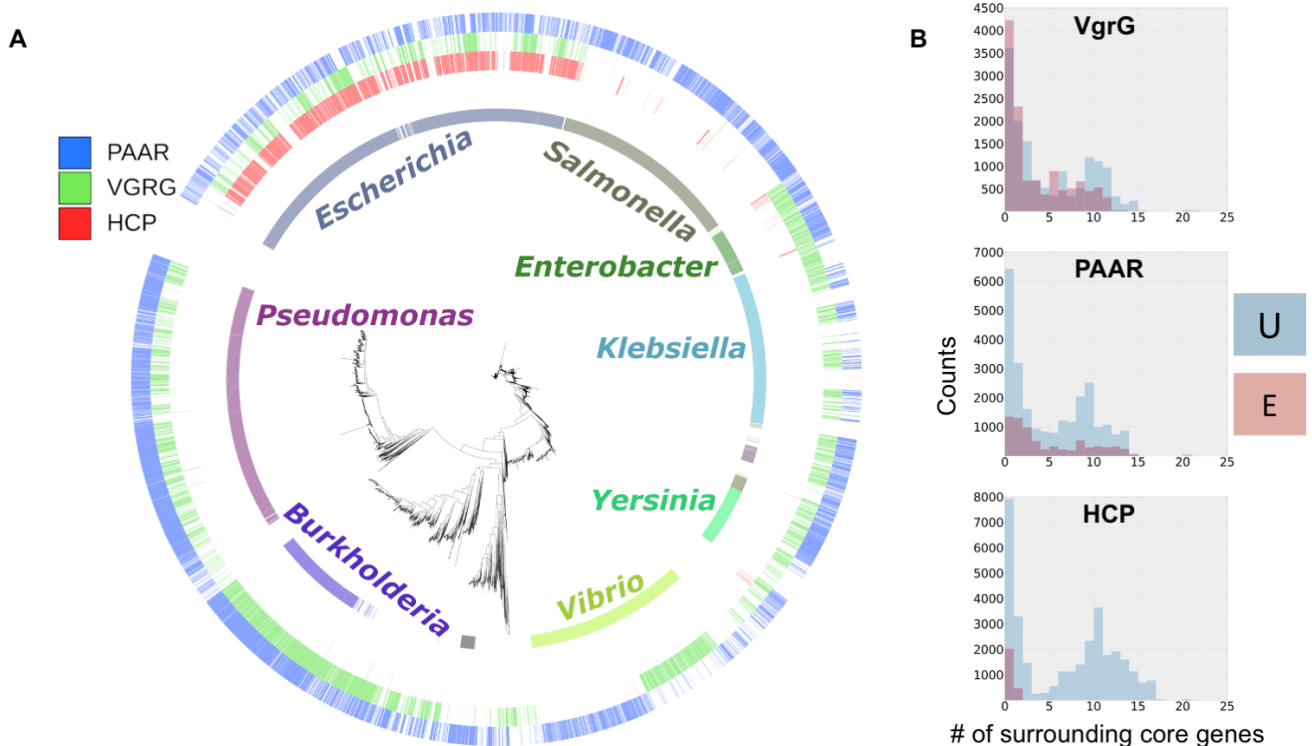

276  
277 **Figure 4. “Evolved” T6SS cores taxonomic and physical distribution.** (A) Phylogenetic tree of  
278 T6SS+ genomes show how “evolved” PAAR, VgrG, and HCP (outer rings) are distributed across  
279 the Genera (inner ring). Only genera with >100 members in the dataset are shown. (B)  
280 Histograms of surrounding genes for each core, “unevolved” (red) or “evolved” (blue).  
281 Overlapping distributions produce a purple color.  
282

283 Many times, bacterial genomes contain a main T6SS operon that encodes all the  
284 structural genes and effectors, both regular and “evolved” effectors. However, often

285 there is also a genomic “orphan” or “auxilliary” operon, which contains just a small  
286 fraction of a T6SS operon, such as an effector gene and its cognate VgrG (Crisan et al.  
287 2019). We asked whether there is a preference for “evolved” T6SS cores to be encoded  
288 in the main T6SS operon, or in smaller orphan/auxiliary operons. Regular HCP with no  
289 C-terminal domain is encoded both in operons and outside of operons. In contrast,  
290 “evolved” HCP have a strong bias for being encoded in orphan operons (98% of  
291 “evolved” HCP have 0 or 1 nearby T6SS core gene), with a minority present in main  
292 operons (Figure 4B). VgrG and PAAR are found in large numbers in both orphan and  
293 main operons, suggesting no bias (Figure 4B).

294

295 Since T6Es act generally as antibacterial toxins (Jurėnas and Journet 2021), the identity  
296 of the C-terminal domains of “evolved” T6SS cores are of high interest to science and  
297 industry. We surveyed all pfam domains encoded in C-terminal domains of HCP, VgrG,  
298 and PAAR. Overall, “evolved” HCP has a very narrow variety of known pfam domains,  
299 as compared to VgrG and PAAR, which is somewhat expected due to the scarcity of  
300 these domains (Figure 5). The most common HCP C-terminal domains encode Colicin-  
301 DNAses, as has been seen previously (Ma, Pan, et al. 2017; Howard et al. 2021)  
302 (Figure 5). The vast majority of VgrG C-terminal domains have no annotation, likely  
303 representing novel toxins. The C-terminal domains of “evolved” PAAR most frequently  
304 encode RHS repeats, that are usually encoded upstream of a toxic domain (Jamet and  
305 Nassif 2015; Ma, Sun, et al. 2017; Donato et al. 2020). Taken altogether, we conclude  
306 that “evolved” HCP has very different characteristics as compared to “evolved” VgrG  
307 and PAAR. “Evolved” HCP are very rare overall and appear nearly exclusively in a  
308 single genus. When “evolved” HCP do occur, they have comparatively short C-terminal  
309 domains, with a narrow variety of known C-terminal pfam domains, likely representing  
310 rare HCP-toxin fusion events. Furthermore, HCP are mostly encoded in orphan  
311 operons, rather than in main T6SS operons.

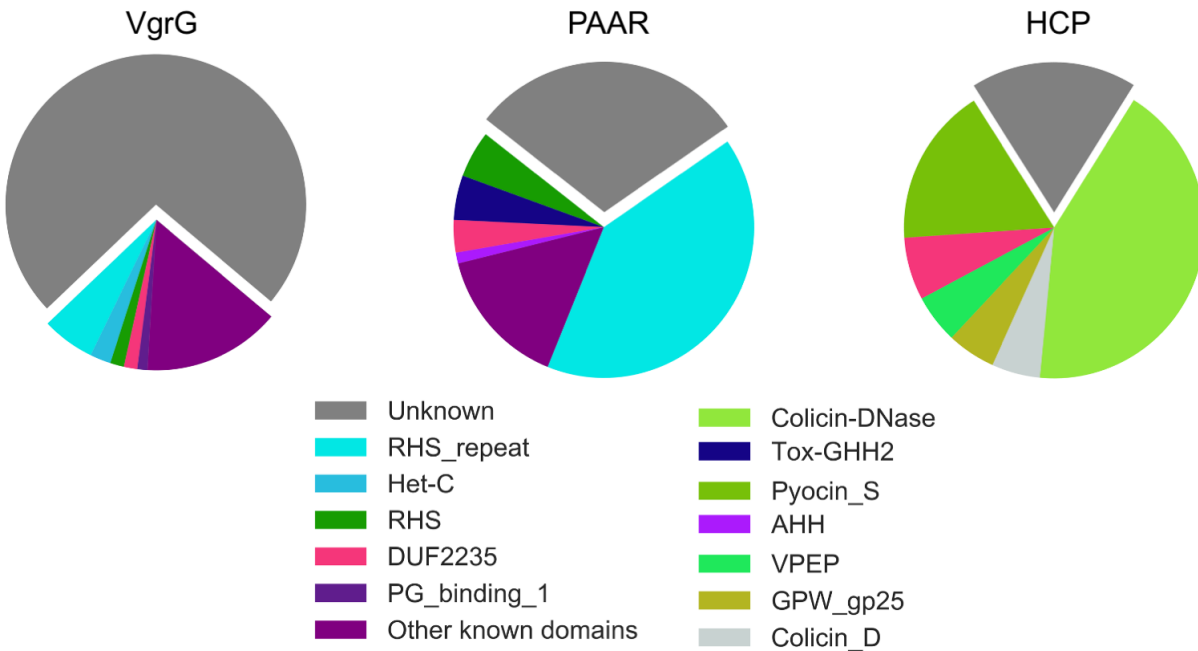

312

313

314 **Figure 5. Many C-terminal T6SS core extensions have no annotation.** Annotations of C-  
315 terminal domains using the pfam database. To avoid phylogenetic bias in plotting proportions  
316 of C-terminal domains, one genome per clade (average distances < 0.1) was sampled. This  
317 sampling was performed 100 times, each time the makeup of the C-terminal domains of  
318 “evolved” cores was noted. After the 100 iterations, the average counts of C-terminal domains  
319 were plotted here (average n ≈ 52, 576, and 21 for VgrG, PAAR, and HCP, respectively).  
320 Domains with less than 1% occurrence on average were considered below threshold for  
321 plotting and grouped together into “Other known domains” (purple). Names in the legend are  
322 the pfam database short names.

323

### 324 **Discovery of a novel toxic putative “evolved” HCP - Type VI immunity pair**

325 HCP C-terminal extensions include extensions that are not mapped to known pfam  
326 domains (18%; Figure 5, right). This was intriguing and represented an opportunity to  
327 discover novel antibacterial T6Es. We designed a pipeline to discover and validate  
328 these toxins (Figure 6A): first, we pulled all HCP genes from T6SS-encoding genomes  
329 from our database and labeled evolved HCP genes by having at least a 70 amino acid  
330 extension after the HCP pfam domain. Then we clustered all the extensions into families  
331 and searched for candidate domains that were functionally unannotated,  
332 phylogenetically scattered, and encoded next to a cognate immunity protein. We called

333 one gene that fit this profile “Eh1” (“Extended HCP1”) (Supplementary Figure 1). Eh1  
334 has no annotated function, is present in various genera, such as *Citrobacter* and  
335 *Salmonella*, and has synteny with a small gene encoded downstream to it  
336 (Supplementary Figure 1, 2). We expressed Eh1 heterologously to test its toxicity to  
337 prokaryotic cells. Uninduced, Eh1 is already highly toxic to *E. coli* (Figure 6B, left),  
338 suggesting leaky expression is enough to stop bacterial growth. However, upon  
339 induction, we see an even higher level of toxicity (Figure 6B, right). Since T6Es are  
340 mainly known to target prokaryotic structures that are widely conserved, the bacteria  
341 that encode these effectors frequently encodes an immunity protein that neutralizes the  
342 T6Es activity. Eh1 had a gene encoded downstream to it, which we hypothesized  
343 served as the immunity gene. Indeed, upon co-expression of Eh1 and its putative  
344 immunity protein, that we termed Ehi1 (“Extended HCP1 immunity”), we saw a  
345 neutralization of Eh1’s toxic activity (Figure 6B), both while the effector is induced and  
346 uninduced. Leakiness of the Ehi1 plasmid promoted cell rescue, even without induction  
347 by IPTG.

348

**A**

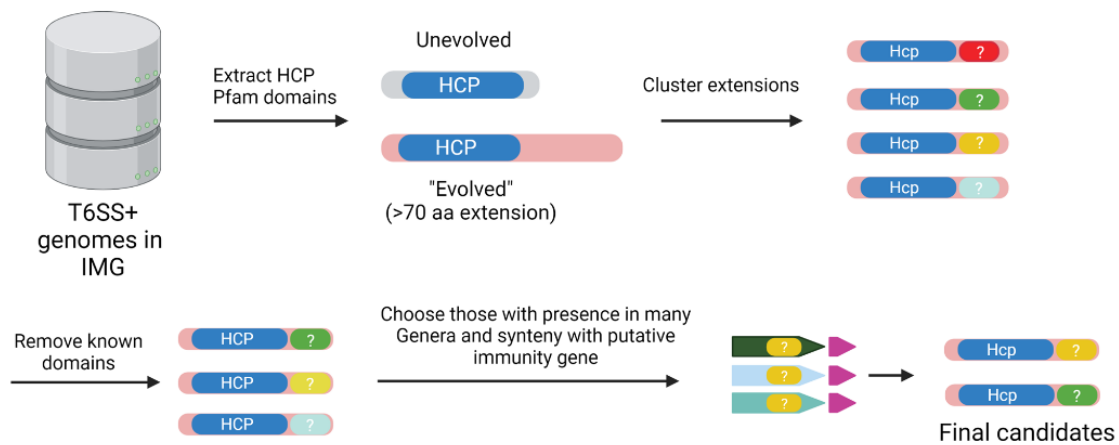

**B**

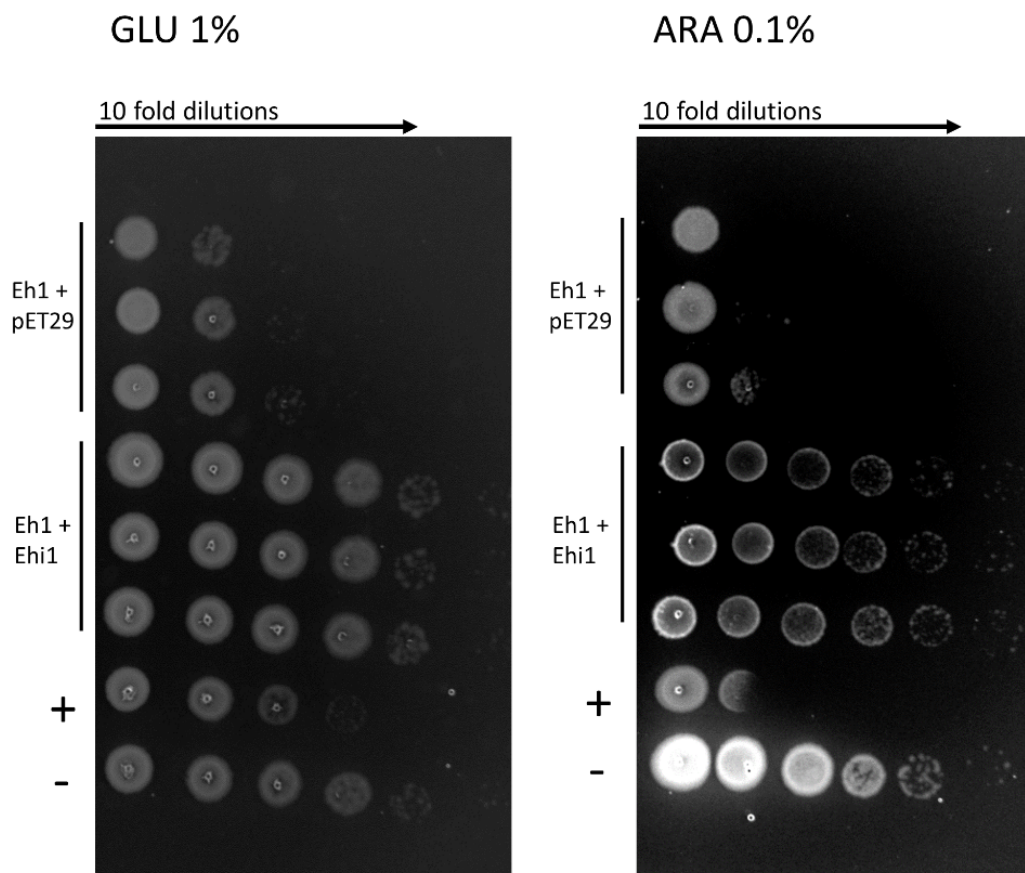

349

350 **Figure 6. HCP C-terminal domain with unknown annotation is toxic and is neutralized by**  
351 **immunity protein.** (A) Pipeline for discovery of novel T6Es in C-termini of HCP. HCP genes from  
352 T6SS genomes were considered "evolved" if they had a >70 amino acid extension. To remove

353 redundancy, C-termini were clustered. C-terminal domains with known annotations were  
354 discarded, while those with wide phylogenetic presence, and with evidence of a putative  
355 immunity protein encoded nearby were kept. Candidate effectors were synthesized and cloned  
356 into an inducible vector. (B) Drop assay of *E. coli* heterologously expressing both Eh1 in pBAD24  
357 and Ehi1 in pET29b, or both Eh1 in pBAD24 and an empty pET29b in uninduced (left, 1%  
358 Glucose) and induced (right, 0.1% Arabinose) conditions. A known toxin was used as positive  
359 control (“+”) and a negative control (empty pBAD24 and pET29b) (“-”) was used to show vector  
360 non-toxicity.

361

### 362 **Discovery of nine toxic putative T6Es in an adaptor-based algorithm**

363 The intriguing presence of the DUF4123 domain in the C-termini of “evolved” VgrG  
364 inspired us to develop a second algorithm to identify T6Es. DUF4123 does not have a  
365 known T6E activity, rather, it is an adaptor of the T6SS (sometimes called a T6SS  
366 “chaperone”), which generally helps load the T6SS machinery with effectors  
367 (Unterweger et al. 2015; Liang, Moore, and Wilton 2015). Effectors are usually encoded  
368 downstream of chaperones, as shown with DUF4123 in Liang et al. (Liang, Moore, and  
369 Wilton 2015). We designed a pipeline for discovery of novel adaptors and T6Es using  
370 these concepts. Other computational pipelines to discover T6Es have been tried  
371 (Russell et al. 2012; Whitney et al. 2013; Salomon et al. 2014; Jana et al. 2019; Jiawei  
372 Wang et al. 2018), but they usually rely on sequence similarity to known T6Es or  
373 genetic linkage to T6SS core genes. The novel approach that we will describe below is  
374 independent of these features.

375

376 The goal of the pipeline was to use a computational approach to systematically discover  
377 novel adaptors and toxins. Although there has been one study that uses an adaptor-  
378 based algorithm, there was no experimental validation of the findings (Liu et al. 2020).  
379 We hypothesized there may be more hidden T6SS adaptors encoded in the C-termini of  
380 T6SS cores. We marked any predicted C-terminal domain that lacks known pfam  
381 annotation as a possible T6SS adaptor (Figure 7A, left). We searched for standalone  
382 versions of these adaptor domains. Namely, we looked for occurrences of the putative  
383 adaptor gene in a single-domain gene in another T6SS-encoding genome (Figure 7A,  
384 right). The result of this analysis gives us examples of putative adaptors that sometimes  
385 were encoded in orphan loci, and even sometimes in “super orphan” loci, i.e. zero T6SS



386 core genes are in the orphan locus. In other words, these putative adaptors are not  
387 genetically linked to any T6SS core gene and we assume that they form non-covalent  
388 contacts with T6SS proteins that are encoded elsewhere in the genome.

389

390 This list of standalone putative adaptors was then surveyed for genes that are located  
391 adjacent to the putative adaptor. We looked for genes that are small and are rapidly  
392 evolving in terms of copy number variations between phylogenetically closely-related  
393 genomes (Figure 7A, right). We hypothesized that these genes were putative T6Es  
394 because it is known that T6Es are encoded downstream of adaptors (Liang, Moore, and  
395 Wilton 2015). We used the rapid evolution filter as a molecular signature of an “arms  
396 race” between attacking bacterial T6E genes and the genome of an attacked bacteria  
397 that likely evolves resistance against T6Es.

398

399 For example, *Azospirillum lipoferum* R1C encodes an evolved PAAR with a C-terminal  
400 domain, which is a putative adaptor domain (Supplementary Figure 3). This C-terminal  
401 domain exists as a standalone gene (that we previously termed as “Hyde2”) in  
402 *Acidovorax avenae subsp. citrulli* AAC00-1 (Supplemental Figure 3). Encoded right next  
403 to it is Hyde1, which is known to be highly toxic to *E. coli* in heterologous expression  
404 experiments, suggesting it may be a T6E (Levy et al. 2017). On the other hand, Hyde2  
405 is only very slightly toxic to *E. coli*, suggesting it is not a T6E (Levy et al. 2017). Based  
406 on the facts that (i) a domain with high similarity to Hyde2 is attached to a core T6SS  
407 domain (PAAR), (ii) it is not strongly toxic to *E. coli*, and (iii) a toxic rapidly evolving gene  
408 is encoded next to it (Supplemental Figure 3), we conclude that Hyde2 is a putative  
409 T6SS adaptor, and that Hyde1 is a putative T6E. Future in depth studies, such as  
410 competition assays with mutant strains and co-IP experiments are needed for further  
411 validation of this model.

412

413 Using this schema, we searched over 11,000 T6SS-encoding genomes, which yielded  
414 43,546 cores with extended C-terminal domains (Supplementary Figure 4). After  
415 clustering these C-termini into 2324 unique families, we removed any known annotation  
416 to known adaptors, effectors, toxins, and enzymes, leaving 726 families with no

417 functional annotation. We considered these possible adaptor sequences, while keeping  
418 in mind they may be effector domains. As explained above, we then searched for  
419 standalone gene versions of these putative adaptors, specifically for those encoded in  
420 orphan and “super orphan” loci, leaving 89 possible candidates. We then manually  
421 screened candidates and then evaluated each locus for presence of a small gene with  
422 signatures of rapid evolution; these were labeled as putative T6Es. We defined the rapid  
423 evolution by copy number variation of the genes between related genomes.  
424 Supplementary Figures 5-12 detail some of our candidates. One example of the output  
425 of this pipeline is shown in Figure 7B, which shows a particular gene pair in a T6SS  
426 operon in the pathogen *Yersinia pseudotuberculosis* sv. O. The upstream gene has an  
427 N-terminal PAAR domain, and attached to it is a C-terminal domain with pfam  
428 annotation DUF3289, which has no known function (Figure 7B). We hypothesized that  
429 DUF3289 is a putative adaptor. Encoded next to this “evolved” PAAR is a gene which  
430 encodes a protein with a DUF943 domain, also with no known function (Figure 7B).  
431 Upon searching other bacterial genomes for orthologs of the DUF3289 domain, we  
432 found that in multiple genomes, there exists a standalone gene version, containing a  
433 DUF3289 domain only. These standalone versions of the DUF3289-encoding putative  
434 adaptors also had synteny with DUF943-encoding genes (Figure 7B, right).  
435 Furthermore, we observed a copy number variation between similar loci, leading to our  
436 hypothesis that DUF943-containing proteins are putative T6Es. One of the standalone  
437 DUF3289-DUF943 pairs was synthesized into inducible expression vectors (Figure 7B,  
438 genes from *Aeromonas piscicola* LMG 24783), along with various other candidates  
439 (Table 1, Supplementary Table 2). Heterologous expression assays in *E. coli* were then  
440 used to rapidly validate our computational predictions. Upon expression of the DUF943-  
441 encoding putative effector Ga0098502\_152467 from *Aeromonas piscicola* LMG 24783  
442 in *E. coli*, we observed strong antibacterial activity (Figure 7C). The adjacent DUF3289  
443 encoding gene, the putative adaptor, was not toxic to *E. coli* (Supplementary Table 2).  
444 Overall, we screened 20 candidates, and our results overall showed seven examples of  
445 non-toxic putative adaptors with downstream T6Es (Supplementary Table 2), and 9  
446 putative T6Es that had a toxic effect on *E. coli* (Figure 7D, Table 1, Supplementary  
447 Figures 13-20). Interestingly, 5 of the candidate T6Es that we experimentally validated

448 have a predicted transmembrane domain (Table 1). Protein modeling reveals highly  
449 hydrophobic helices in the structures (Supplementary Figure 21). Therefore, we  
450 speculate that these proteins are killing microbes as they degrade the bacterial  
451 membrane or destroy the proton motive force by forming pores. A transmembrane  
452 domain is also present at the N terminus of Hyde1 putative T6E (Levy et al. 2017).

453

454 Although these experiments are only a first indication of possible T6Es, we underscore  
455 the fact that a number of species we studied have no known T6SS effector, as per a  
456 search in the SecReT6 database (J. Li et al. 2015). This is important because many of  
457 these species have important effects on medicine and economics. For example,  
458 *Aeromonas piscicola* is found in diseased fish, *Klebsiella oxytoca* is a drug resistant  
459 opportunistic pathogen, *Burkholderia cepacia* is an opportunistic human pathogen,  
460 *Pectobacterium wasabiae* is a plant pathogen, and *Citrobacter koseri* is a known  
461 opportunistic human pathogen (Beaz-Hidalgo et al. 2009; Darby et al. 2014; Singh,  
462 Cariappa, and Kaur 2016; Mahenthiralingam, Urban, and Goldberg 2005; Kim et al.  
463 2009; Deveci and Coban 2014). First hints of a possible T6E in these species allows for  
464 other laboratories to quickly study these potentially important virulence factors that may  
465 affect colonization and/or pathogenesis.

466

467 Taken altogether, we have used the birds-eye-view analysis of “evolved” T6SS cores to  
468 design two algorithms for discovery of putative novel T6Es. The latter algorithm is  
469 sequence and location independent, and can identify “super orphan” loci of putative  
470 T6Es. By using bioinformatic analysis, we were able to design a high throughput  
471 approach that led to candidate T6E discovery in eight organisms. Using heterologous  
472 expression experiments we showed toxicity in 10 genes, which we label as putative  
473 T6Es. This is in contrast to deep, yet narrow studies of T6Es which often result in  
474 discovery of a single T6E family from one species. Our approach is broader and may  
475 provide a faster way to screen for genes for further basic and applied research.

476

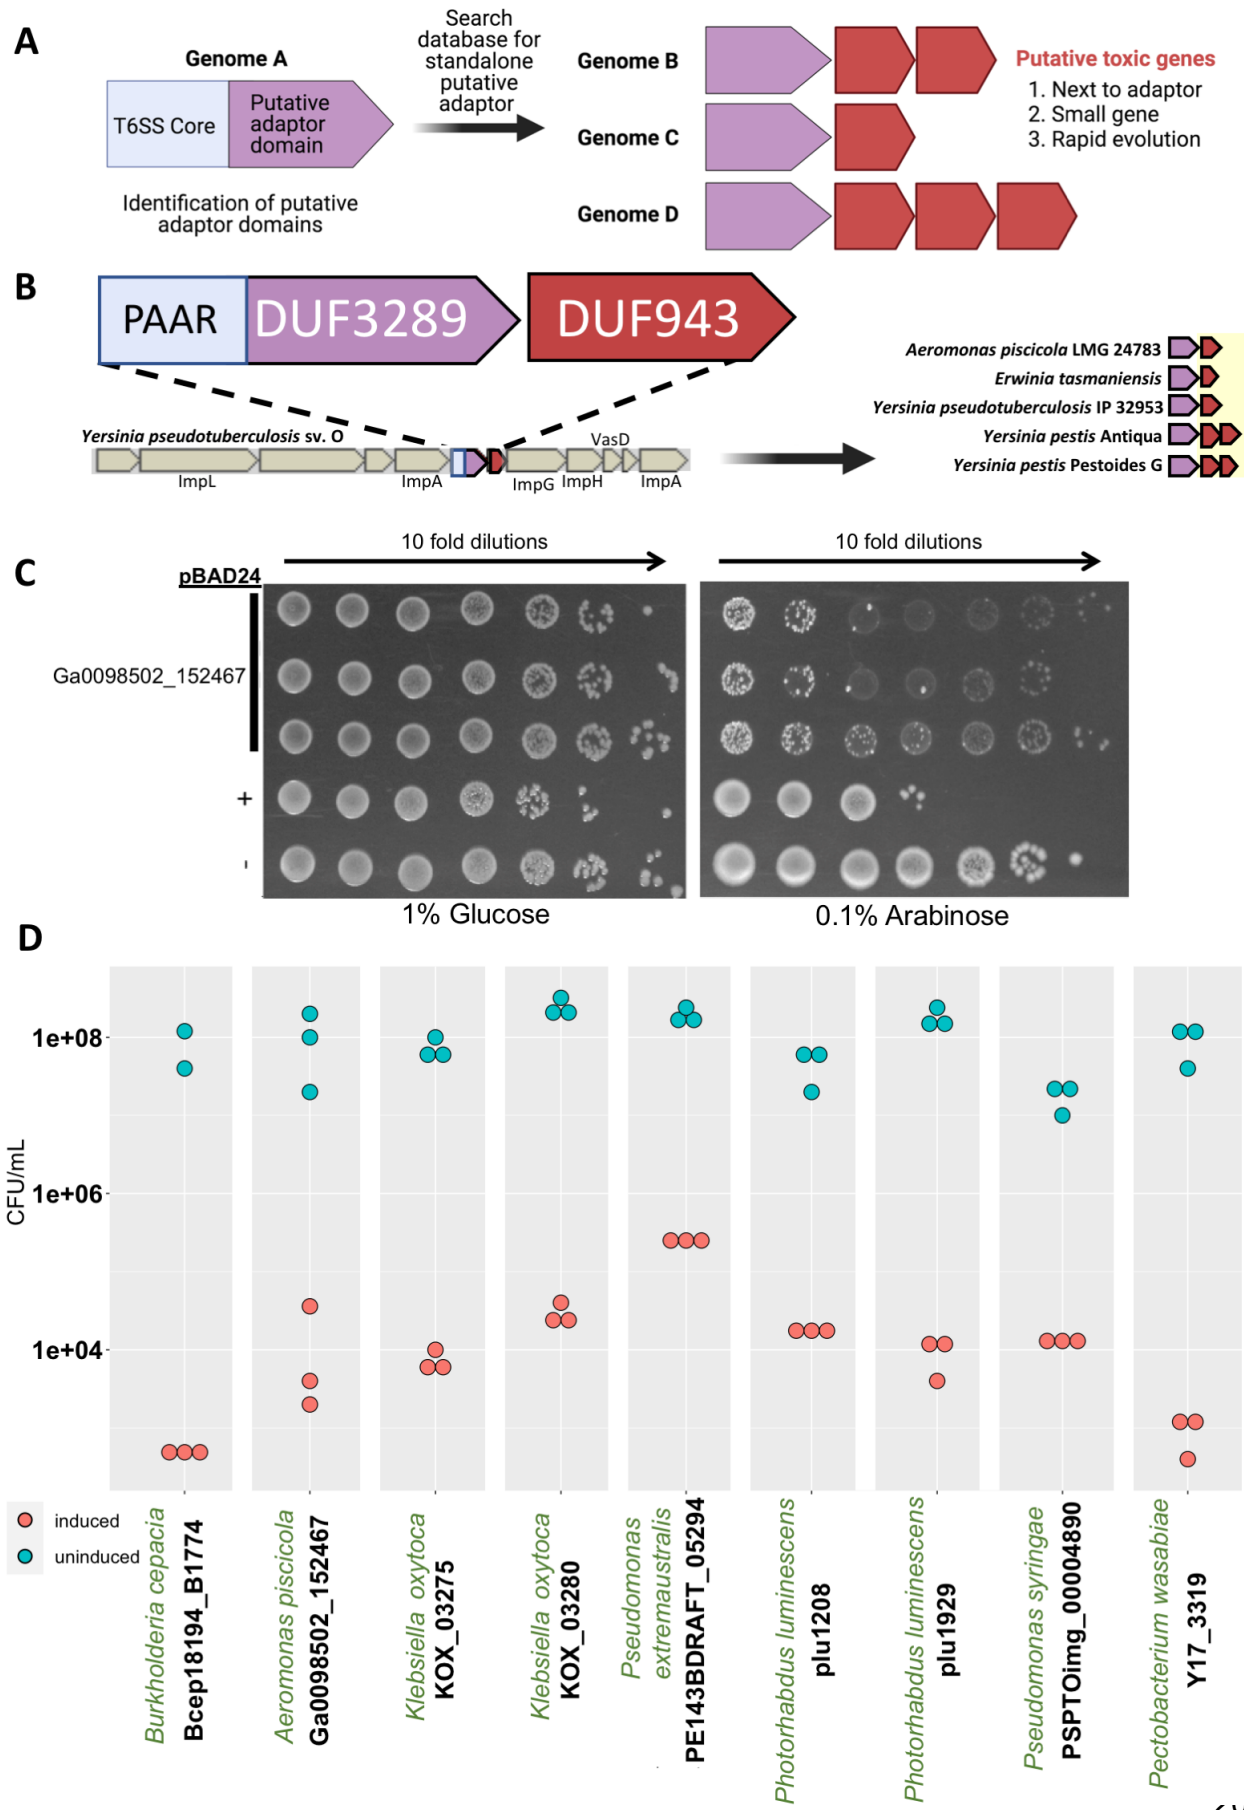

478 **Figure 7. Toxicity of predicted T6Es to *E. coli*.** (A) Adaptor- and rapid evolution-based  
 479 algorithm. Left side shows a protein encoded by a gene in Genome A with an N-terminal T6SS  
 480 core domain (light blue) and a C-terminal unknown domain, which is considered a putative  
 481 adaptor domain (purple). Using this C-terminal domain as a query in a sequence database, we  
 482 searched specifically for standalone versions of this domain, i.e. genes with the putative  
 483 adaptor domains with no T6SS core domain (right, purple). Encoded next to these adaptors are  
 484 putative T6Es (red), which have signs of rapid evolution (copy number variation). (B) An  
 485 example result from the algorithm. In a T6SS operon in *Yersinia pseudotuberculosis* sv. O (left) is  
 486 a gene that corresponds to a protein with an N-terminal PAAR domain (light blue), and a C-  
 487 terminal domain with unknown function DUF3289 (purple), which we considered a putative  
 488 adaptor. Upon looking for orthologs of the DUF3289 domain in other genomes, we identified  
 489 multiple standalone versions, with a linked gene undergoing rapid evolution (right, red genes).  
 490 (C) A representative drop assay. Empty pBAD24 plasmids (-), or positive control (a known toxin,  
 491 +), or putative T6E from *Aeromonas* (see B, right side) were transformed into *E. coli* BL21 (DE3)  
 492 pLysS. Colonies were grown overnight, and were normalized and serially ten fold diluted and  
 493 dropped onto agar plates with repressing 1% Glucose (left) and inducing 0.1% Arabinose (right).  
 494 (D) Quantification of the drop assay, as well as for other putative T6Es which were toxic to *E.*  
 495 *coli*. X-axis lists genomes in green and locus tags of the tested genes in black.  
 496  
 497

| Organism                                                             | IMG gene ID | Locus Tag         | Original prediction | Toxicity to <i>E. coli</i>  | Algorithm       | total orphan? (located away of T6SS genes in the genome) | Has trans membrane helices? |
|----------------------------------------------------------------------|-------------|-------------------|---------------------|-----------------------------|-----------------|----------------------------------------------------------|-----------------------------|
| <i>Pseudomonas syringae</i> pv. tomato DC3000 (DC3000 gold standard) | 2508866418  | PSPTOimg_00004890 | T6E                 | yes                         | Rapid Evolution | no (PAAR in operon)                                      | no                          |
| <i>Burkholderia cepacia</i> 383                                      | 637766623   | Bcep18194_B1774   | T6E                 | yes                         | Rapid Evolution | yes                                                      | yes                         |
| <i>Photobacterium luminescens</i>                                    | 637463012   | plu1208           | T6E                 | yes                         | Rapid Evolution | yes                                                      | yes                         |
| <i>Photobacterium luminescens</i>                                    | 637463725   | plu1929           | unclear             | not at 0.1mM but yes at 0.5 | Rapid Evolution | no (VgrG in operon)                                      | no                          |

|                                                  |                |                    |         | mM IPTG |                 |                                          |     |
|--------------------------------------------------|----------------|--------------------|---------|---------|-----------------|------------------------------------------|-----|
| <i>Pectobacterium wasabiae</i>                   | 253842729<br>1 | Y17_3319           | unclear | yes     | Rapid Evolution | no (PAAR in operon; DUF4123 adjacent)    | yes |
| <i>Aeromonas piscicola</i> LMG 24783             | 264970502<br>2 | Ga0098502_152467   | T6E     | yes     | Rapid Evolution | yes                                      | no  |
| <i>Klebsiella oxytoca</i> KCTC 1686              | 251171487<br>0 | KOX_03280          | T6E     | yes     | Rapid Evolution | yes                                      | yes |
| <i>Klebsiella oxytoca</i> KCTC 1686              | 251171486<br>9 | KOX_03275          | adaptor | yes     | Rapid Evolution | yes                                      | no  |
| <i>Pseudomonas extremaustralis</i> 14-3 sub14-3b | 254995136<br>8 | PE143BDR AFT_05294 | T6E     | yes     | Rapid Evolution | yes                                      | yes |
| <i>Citrobacter koseri</i> FDAARGOS_164           | 266641090<br>9 | Ga0109959_110      | T6E     | yes     | HCP extension   | No, but PAAR and VgrG located 21kbp away | no  |

498

499 **Table 1. Genes toxic to *E. coli* are defined as putative T6Es.**

500

## 501 **Discussion**

502

503 In this study, we used a combined bioinformatic-experimental approach to screen and  
504 identify 10 putative T6Es. Not only did we survey the universe of C-terminal extensions  
505 of “evolved” T6SS cores, we used the information to develop two computational  
506 approaches that identify novel T6SS effectors in thousands of bacterial genomes.  
507 Notably, using the second algorithm, the adaptor-based algorithm, we were able to  
508 detect some examples of effectors independent of sequence homology to known  
509 effectors and independent of proximity to T6SS cores. We tested the toxicity of several  
510 candidate effectors that we predicted via heterologous expression experiments in *E. coli*  
511 and showed that many are indeed toxic and for one, we have a cognate immunity gene  
512 that protects from toxicity. These experiments are common in the T6SS research field to  
513 confirm antibacterial or anti-eukaryotic activity. We are aware that in order to define a

514 gene as a *bona fide* T6SS effector we need to provide and evidence of T6SS-  
515 dependent secretion, and that the presence of the gene in the attacking strain is  
516 correlated with higher fitness in competition assays against a prey strain that lacks the  
517 immunity protein. In our analysis, we provided strong genetic evidence that the novel  
518 toxins are associated with T6SS, but we did not construct mutants in the encoding  
519 strains nor identify the conditions in which the toxins are being secreted. Therefore, to  
520 be cautious, we termed the new genes “candidate” or “putative” T6SS effectors. Future  
521 experiments are required to confirm that the candidate effectors are secreted in a  
522 T6SS-dependent manner and serve for intercellular competition purposes.  
523 Nevertheless, using computational evidence and a simple bioassay, we were able to  
524 screen and discover a “short list” of putative T6Es for future studies. This process can  
525 theoretically be scaled up to characterize the toxicity of all families of unknown C-  
526 terminal domains of “evolved” cores, providing an exhaustive list of promising hits for  
527 deeper study.

528  
529 Unsurprisingly, some of the predicted adaptors were toxic in the heterologous  
530 expression assay, as it is possible that the C-terminal domains attached to T6SS cores  
531 are toxins. Indeed, we also took advantage of this concept for the first algorithm  
532 described in this paper (Figure 6A). We therefore expect the downstream putative  
533 “effector” of a toxic “adaptor” to possibly be an immunity gene.

534  
535 We also saw cases where neither the putative adaptor or the putative T6E are toxic,  
536 which may be because they are not expressed in the correct compartment, i.e. one or  
537 the other may need periplasmic expression. We kept in mind that *E. coli* is likely not the  
538 natural target of a specific T6E, so this may also be a reason for predicted effectors  
539 having no toxic activity. Nevertheless, non-toxicity of some of the predicted genes  
540 demonstrates that the toxicity to *E. coli* is not simply due to overexpression of foreign  
541 protein.

542  
543 One specific putative T6E (plu1929) was not toxic in heterologous expression assays at  
544 0.1mM of IPTG induction. However, upon induction at 0.5 mM, it was indeed toxic

545 (Supplementary figure X, Table 1). We counted this as a possible T6E, as we saw that  
546 even at 0.5 mM IPTG its upstream putative adaptor (plu1928) was not toxic,  
547 demonstrating that at this higher level of induction, there was still not a general toxicity  
548 caused by overexpression (Supplementary Figure 15). We reasoned that plu1929  
549 should be investigated further for evidence of T6SS effector activity, and therefore  
550 counted it in our list of putative T6Es (Table 1).

551  
552 We also noted that for many of the putative effectors, we could not predict cognate  
553 immunity genes. This could be due to the fact that the immunity protein was either  
554 encoded somewhere else in the genome, but also could be due to non-immunity-  
555 protein-based immunity, i.e. by general mechanisms of immunity (Le et al. 2020; Toska,  
556 Ho, and Mekalanos 2018; Hersch et al. 2020; Hersch, Manera, and Dong 2020;  
557 Flaugnatti et al. 2021).

558  
559 Our previous study described the extracellular contractile injection system (eCIS) which  
560 is enriched in understudied bacterial genera (Alexander Martin Geller et al. 2021; L.  
561 Chen et al. 2019). eCIS is structurally and evolutionarily related to the T6SS, with the  
562 first being extracellular and the second being membrane-bound. It was also noted that  
563 eCIS and T6SS are not frequently encoded together, suggesting an overlapping  
564 function (L. Chen et al. 2019). As expected, we saw that T6SS-encoding genomes had  
565 an enrichment of well-studied Genera, the opposite of the result of eCIS. We saw the  
566 genera that encoded eCIS and for T6SS were largely non-overlapping, yet we saw  
567 exceptions. *Dickeya* and *Xenorhabdus* genomes are statistically enriched in both eCIS  
568 and T6SS, and *Shigella* genomes are statistically depleted in both eCIS and T6SS  
569 (Figure 2) (Alexander Martin Geller et al. 2021; L. Chen et al. 2019). eCIS-encoding  
570 bacteria are mostly found in terrestrial and aquatic environments, and are statistically  
571 underrepresented in human isolates, and specifically in human pathogens (A. M. Geller  
572 et al. 2020; Alexander Martin Geller et al. 2021). Here, we saw the T6SS-encoding  
573 genomes are the opposite, with enriched isolation from humans, as well as enriched in  
574 a pathogenic lifestyle. Overall, our analysis fits well with previous knowledge about eCIS  
575 and T6SS (Alexander Martin Geller et al. 2021; L. Chen et al. 2019).



576

577 eCIS effectors seem to be loaded in the lumen of the contractile injection system  
578 (Desfosses et al. 2019; Ericson et al. 2019). These effector proteins can be quite large,  
579 e.g. AFP18 is 2,366 amino acids in length (Hurst Mark R. H., Glare Travis R., and  
580 Jackson Trevor A. 2004); Mif1 is 943 amino acids (Ericson et al. 2019). There does not  
581 seem to be a size constraint for effector loading into the lumen of the eCIS. However,  
582 our current analysis of “evolved” HCP suggests that there is a strict size limit, as well as  
583 a noted lack of variety of C-terminal domains as compared to the other T6SS cores. It is  
584 possible that “cargo” (non-covalently bound) effectors may have a larger size limit. The  
585 large size of eCIS effectors suggests they are unfolded in the lumen of the particle, and  
586 that T6SS may not allow for unfolded effectors in the lumen, based on the fact that, in at  
587 least one case, large HCP cargo effectors block T6SS-mediated toxicity (Howard et al.  
588 2021). This is sensible if “evolved” HCP are loaded in the process of extension of  
589 regular HCP hexamer units into a tube, while eCIS may be loaded with an effector after  
590 assembly, although this is currently understudied. It is possible that a study of T6SS  
591 subtype iv may provide examples of larger HCP-related T6Es, as it may assemble more  
592 like eCIS. Further studies of T6SS assembly with “evolved” HCP are needed.

593

594 Our study used T6SS domains TssJ, TssL, and TssM to define the T6SS genomes  
595 (Supplementary Table 1). We specifically saw that we captured the most common T6SS  
596 subtype i (and a handful of possible subtype ii), but did not include subtypes iii or iv.  
597 This is due to the fact that the conserved domains were likely defined mostly on subtype  
598 i T6SS. Nevertheless, there have been few general bioinformatic studies of the T6SS  
599 since the discovery of this system, and we were able to update the overall picture using  
600 11,000+ genomes. Future studies are needed to properly define conserved domains  
601 that belong to subtype iii and subtype iv, making it possible to research their  
602 characteristics overall. Even so, there are still large numbers of undiscovered effectors  
603 (LaCourse et al. 2018), as we have shown here by providing ten more putative T6Es.

604

605

606

607

## 608 **Materials and Methods**

609 Selected scripts used in search and analyses is available at

610 [https://github.com/alexlevylab/T6E\\_discovery](https://github.com/alexlevylab/T6E_discovery)

611

### 612 **Phylogenetic tree construction**

613 Using the IMG database of publicly available bacterial genomes (Markowitz et al. 2012;

614 I.-M. A. Chen et al. 2017, 2019), we searched for genomes with T6SS marker domains

615 TssJ, TssL, and TssM (Supplementary Table 1). Because of use of these marker

616 genes, we expected to mainly find T6SS of subtype i and ii, as TssJ, L, and M are

617 present in those subtypes (Russell et al. 2014).

618

619 Phylogenetic trees were constructed using a subset of universal marker genes (Puigbò,

620 Wolf, and Koonin 2009), i.e. 29 COGs (Galperin et al. 2021) corresponding to ribosomal

621 proteins out of 102 COGs in Puigbò et al. (Puigbò, Wolf, and Koonin 2009). To preserve

622 the quality of the tree, genomes missing more than one COG were dropped from

623 analysis. COGs from each organism were aligned separately using clustal omega

624 version 1.2.4 (Sievers et al. 2011) with default settings. Alignments for each COG were

625 then trimmed using TrimAl version 1.4 (Capella-Gutiérrez, Silla-Martínez, and Gabaldón

626 2009) using the “automated1” flag. Genomes with missing COG sequences were added

627 as gaps into the alignments. Each trimmed alignment was then concatenated by

628 genome, to create an amalgamated 30 COG sequence. This was inputted into

629 VeryFastTree, version 3.0.1 (Piñeiro, Abuín, and Pichel 2020) using standard settings.

630 Trees were visualized on iTOL (Letunic and Bork 2019) and using ggtree and

631 ggtreeextra packages (Yu et al. 2017; Xu et al. 2021). Representative members of each

632 taxonomic Family were used to build the phylogenetic tree in Figure 1, while Figure 4

633 used all members of T6SS-encoding genomes.

634

### 635 **Enrichment analyses**

636 The taxonomic data from the T6SS database was compared to the number of genera in

637 publicly available genomes of Bacteria from IMG (Markowitz et al. 2012; I.-M. A. Chen

638 et al. 2019). A Fisher exact test was calculated for each Genus, which returned an odds

639 ratio and an associated p-value, the latter of which was corrected using the Benjamini  
640 Hochberg method (FDR) for multiple hypothesis testing.

641  
642 To correct for taxonomic bias that affects enrichment analysis, a population-aware  
643 enrichment analysis based on Scoary (Brynildsrud et al. 2016) version 1.6.16 was used.  
644 The inputs to Scoary were (1) the guide tree, (2) a presence-absence file, indicating if a  
645 genome encodes for T6SS, (3) metadata files that indicate for each genome if they  
646 possess a certain characteristic, e.g. whether it was isolated from soil. One guide tree  
647 was created per metadata category, based on universal marker genes (see section on  
648 phylogenetic tree construction) and only those entries with at least 25 instances in the  
649 database were included.

650

#### 651 Search for “evolved” effectors

652 An “evolved” effector was defined as an HCP, VgrG or PAAR that has an extension of  
653 at least 70 amino acids downstream to the core domain (i.e. the pfam domain that  
654 defines the HCP, VgrG or PAAR). In the case of “evolved” HCP and PAAR, there are  
655 either one or two pfam domains that define the core domain, and all were used to  
656 search for “evolved” cores (HCP: pfam05638, PAAR: pfam05488 and pfam13665;  
657 Supplementary Table 1). However, VgrG has multiple domains that define it  
658 (pfam05954, pfam06715, pfam10106, pfam13296, pfam04717; Supplementary Table  
659 1), so the “core domain” boundaries are less clear. Many times, the conserved domains  
660 for VgrG in the COG and TIGRFAM (Haft et al. 2013) domains were found in a given  
661 gene, however the pfam domain was not found in that same gene (TIGR domains:  
662 TIGR01646, TIGR03361; COG domains: COG3501, COG4253, COG4540, COG3500,  
663 COG4379). Because of these issues, we therefore defined the “evolved” VgrG based on  
664 length. Using a Gaussian Mixture Model, we searched for two distributions in all VgrG  
665 based on amino acid length, “unevolved” and “evolved”. Since most of the “evolved”  
666 VgrGs having a known fused C-terminal domain were quite large, we identified a  
667 threshold between the two distributions. We used the Scikit-learn library (Pedregosa et  
668 al. 2011) with the function GaussianMixture with parameters of “full” covariance. In  
669 order to define the threshold for the “evolved” VgrG, we took the mean length of the

670 “unevolved” VgrG distribution (724aa) and added one standard deviation (72aa), which  
671 summed to 796aa length. In other words, all genes with any VgrG pfam domain that is  
672 greater than 796 amino acids in length were considered “evolved”.

673

#### 674 Counting “evolved” percentage

675 In order to see which percentage of each core is “evolved” without phylogenetic bias,  
676 we collapsed the phylogenetic tree into groups of leaves with <0.1 branch lengths and  
677 sampled one taxon each iteration from each sub-group. Then, the percentage of  
678 “evolved” cores was counted. We sampled for 10,000 iterations, and took the final  
679 average number of “evolved” cores for each core.

680

#### 681 “Evolved” HCP effector algorithm

682 All HCP genes were extracted from 11,310 T6SS-encoding genomes, based on the  
683 HCP pfam domain (pfam05386). “Evolved” HCPs were defined as described above.  
684 The start coordinate of C-terminal extensions of HCP was defined based on the end  
685 coordinate of the alignment of the HCP pfam domain. C-terminal extensions with known  
686 pfam annotations were filtered out, and all unknown C-terminal extensions were  
687 clustered using CD-HIT (W. Li and Godzik 2006; Fu et al. 2012) version 4.8.1 with at  
688 least 60% identity and at least 70% coverage of both representative and query (n=155  
689 clusters). Cluster representatives were then searched in HHpred (Söding, Biegert, and  
690 Lupas 2005). Representatives that had a hit for a known effector in HHpred were  
691 removed. The remaining representatives with unknown function were queried using  
692 BLAST (Camacho et al. 2009) against the nr database with default parameters. Queries  
693 that had subjects in several Genera (Supplementary Figure 2), and had putative  
694 immunity genes (small downstream genes with synteny to putative effectors) were  
695 chosen as candidates and were synthesized.

696

#### 697 Adaptor-based “super orphan” algorithm

698 Since this algorithm depends on detection of rapid evolution between phylogenetically  
699 related genomes, the search space for this pipeline began with genomes that were  
700 clustered into similarity groups (by 95% Average Nucleotide Identity), n = 43,136

701 genomes. We used genome clusters which had at least 50% of the genomes with the  
702 full complement of marker genes TssJ, TssL, TssM (Supplementary Table 1). This  
703 resulted in 11,310 T6SS-encoding genomes.  
704 From these genomes, HCP, VgrG, and PAAR genes were extracted (n = 148,414).  
705 Those with C-terminal extensions greater than 100 amino acids and less than 500  
706 amino acids were taken for further analysis (this is because most C-terminal extensions  
707 were in this range, and large outliers were not our focus in this study). The boundaries  
708 were defined by the start and end alignments of the pfam HMM profiles with each gene.  
709 This resulted in 43,546 HCP, VgrG, and PAAR that were considered “evolved”. We then  
710 clustered the C-terminal domains using CD-HIT version version 4.8.1 using parameters  
711 for  $\geq 65\%$  identity and  $\geq 80\%$  coverage on both query and subject. We then  
712 submitted the representative sequences of the C-termini to the NCBI CDD (Marchler-  
713 Bauer et al. 2015) search, which identifies conserved domains. We were able to label  
714 C-termini as having a known toxic enzymatic domain, or those without a known function.  
715 Those with known enzymatic/toxin domains were discarded. This left 726 clusters with  
716 putative T6SS adaptor function (or toxic effector function). Using DIAMOND (Buchfink,  
717 Xie, and Huson 2015; Buchfink, Reuter, and Drost 2021) version 2.0.4.142, we  
718 searched the IMG database using the “blastp” subcommand with default parameters for  
719 standalone versions of these C-termini, i.e. genes with the putative adaptor domain only  
720 (not any core domain). C-termini with no standalone domain were dropped from  
721 analysis, as we wanted to design an algorithm that could identify effectors and adaptors  
722 in “super orphan” loci. A “super orphan locus” is a T6SS related genes that are located  
723 away of any known T6SS gene, in comparison to an orphan operon which may have a  
724 few T6SS genes, but not the full T6SS operon. 89 adaptor clusters were found to be  
725 encoded in orphan or super orphan operons. Sixteen of these adaptor clusters were  
726 manually chosen for downstream analysis. Of these, seven were found to have copy  
727 number variation. This was measured by taking genome clusters, and aligning  
728 homologous regions, and looking for signs of variation in copy number.

729

730 Protein modeling and visualization

731 Amino acid sequences of the T6Es were submitted to the webserver of Robetta, using  
732 the RoseTTAfold option (<https://robetta.bakerlab.org/submit.php>) (Baek et al. 2021).

733

#### 734 Drop assays

735 Putative T6Es were synthesized (codon optimized for *E. coli*), and cloned into either  
736 pET28, pET29, or pBAD24 plasmids by Twist Bioscience. The plasmids were then  
737 transformed into *E. coli* BL21 (DE3) pLysS strain using either heat shock or  
738 electroporation. Overnight cultures of the strains harboring the vectors of interest were  
739 grown in LB containing the proper selection: Kan or Amp for pET28/29 or pBAD24,  
740 respectively. The cultures were normalized to 0.5 OD600 and subsequently serially ten-  
741 fold diluted. Dilutions were spotted on LB agar containing the proper selection and  
742 inducer (100  $\mu$ M IPTG; 0.1% Arabinose) or repressor (1% glucose) and the plates were  
743 incubated overnight at 37 degrees Celsius.

744

745 For testing of immunity genes, the plasmids of interest, one either pET28 or 29, and the  
746 other pBAD24, were co-transformed into *E. coli* BL21 (DE3) pLysS using  
747 electroporation. The doubly-resistant colonies were then grown overnight and diluted  
748 and plated as mentioned above, except that plates had either 1% Glucose, 1% Glucose  
749 and 0.1 mM IPTG, 0.1% Arabinose, or 0.1% Arabinose and 0.1 mM IPTG.

750

#### 751 Visualization

752 Many figures (3A, 6A, and 7A) were produced using BioRender (BioRender.com).

753

#### 754 Supplementary Information

##### 755 **Data:**

756 **Supplementary Data 1. Genomes with T6SS marker genes.** Attached supplementary data file  
757 with accession IDs and phylogeny of the 11,832 genomes with T6SS marker genes.

758

759 **Supplementary Data 2. Scoary enrichment/depletion analysis data.** The data corresponding to  
760 Figure 2. The highlighted columns were plotted. The outputs are described in the manual for  
761 scoary (<https://github.com/AdmiralenOla/Scoary#output>)

762

763 **Supplementary Data 3. T6SS cores gene data.** IMG gene IDs for core genes and their associated  
 764 pfam domains, both core and C-terminal domains. Number of genes of T6SS genes surrounding  
 765 each gene is listed. Gene architecture shows which domains make up the gene from N- to C-  
 766 terminus.

767

768 **Tables:**

769 **Supplementary Table 1. Conserved T6SS domains used in this study.**

| Database | Accession | Domain name                     | Used for                   |
|----------|-----------|---------------------------------|----------------------------|
| pfam     | pfam05488 | PAAR domain                     | search for “evolved” cores |
| pfam     | pfam13665 | DUF4150 (PAAR like)             | search for “evolved” cores |
| pfam     | pfam05954 | Phage GPD protein (VgrG analog) | search for “evolved” cores |
| pfam     | pfam06715 | gp5 repeats (VgrG component)    | search for “evolved” cores |
| pfam     | pfam04717 | base V (VgrG component)         | search for “evolved” cores |
| pfam     | pfam13296 | T6SS_VgrG                       | search for “evolved” cores |
| pfam     | pfam10106 | DUF2345                         | search for “evolved” cores |
| pfam     | pfam05638 | HCP                             | search for “evolved” cores |
| pfam     | pfam17642 | TssD                            | search for “evolved” cores |
| COG      | COG3455   | VasL (TssL)                     | Defining T6SS+ genomes     |
| COG      | COG3521   | TssJ                            | Defining T6SS+ genomes     |
| COG      | COG3523   | TssM                            | Defining T6SS+ genomes     |

770

771

772 **Supplementary Table 2. Tested genes that were not toxic to *E. coli*.**

| Organism                 | IMG gene ID | Locus Tag | Predicted putative adaptor or putative T6E | Toxicity to <i>E. coli</i> | Algorithm       | total orphan?       | Has trans membrane helices? |
|--------------------------|-------------|-----------|--------------------------------------------|----------------------------|-----------------|---------------------|-----------------------------|
| Phototahbdus luminescens | 637463013   | plu1209   | adaptor                                    | no                         | Rapid Evolution | yes                 | yes                         |
| Phototahbdus luminescens | 637463724   | plu1928   | unclear                                    | no                         | Rapid Evolution | no (VgrG in operon) | no                          |

|                                                  |                |                       |         |                          |                 |                                 |     |
|--------------------------------------------------|----------------|-----------------------|---------|--------------------------|-----------------|---------------------------------|-----|
| <i>Pseudomonas chlororaphis</i>                  | 261754655<br>0 | Ga0070644_<br>5250    | adaptor | no                       | Rapid Evolution | No, but PAAR located 21kbp away | no  |
| <i>Aeromonas piscicola</i> LMG 24783             | 264970502<br>1 | Ga0098502_<br>152466  | adaptor | no                       | Rapid Evolution | yes                             | no  |
| <i>Pseudomonas</i> sp. LE6C9                     | 270581895<br>9 | Ga0139558_<br>113297  | adaptor | no                       | Rapid Evolution | No, but PAAR located 14kbp away | no  |
| <i>Pseudomonas</i> sp. LE6C9                     | 270581895<br>8 | Ga0139558_<br>113296  | T6E     | no (but drops are faded) | Rapid Evolution | No, but PAAR located 14kbp away | yes |
| <i>Proteus mirabilis</i> HI4320                  | 642577639      | PMI1281               | T6E     | no                       | Rapid Evolution | yes                             | yes |
| <i>Proteus mirabilis</i> HI4320                  | 642577640      | PMI1282               | adaptor | no                       | Rapid Evolution | yes                             | no  |
| <i>Pseudomonas extremaustralis</i> 14-3 sub14-3b | 254995136<br>7 | PE143BDRA<br>FT_05293 | adaptor | no                       | Rapid Evolution | yes                             | yes |
| <i>Marinobacter subterranei</i> JG233            | 265112895<br>8 | Ga0100709_<br>112239  | T6E     | no                       | Rapid Evolution | no                              | yes |
| <i>Marinobacter subterranei</i> JG233            | 265112895<br>9 | Ga0100709_<br>112240  | adaptor | no                       | Rapid Evolution | no                              | no  |

773

774

775 **Figures:**

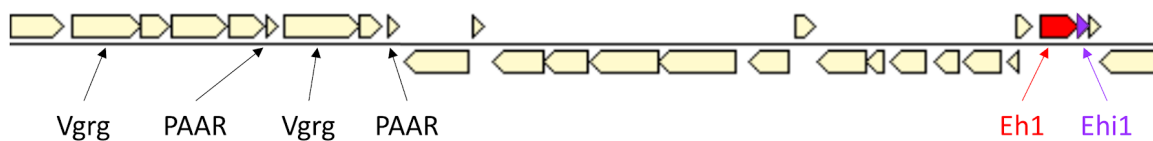

776

777 **Supplementary Figure 1. Eh1 and Ehi1 are not part of a T6SS operon, although core genes are**  
778 **nearby.** *Citrobacter koseri* FDAARGOS\_164 (IMG taxon ID: 2663763285). Eh1 coordinates:  
779 1329871 - 1330971 (locus tag: Ga0109959\_1101377). Ehi1 coordinates: 1330955 – 1331209,  
780 (locus tag: Ga0109959\_1101378).



781

782

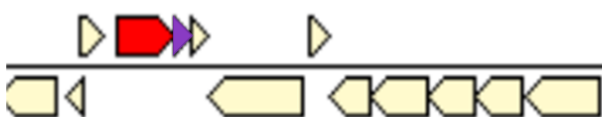

**Eh1**

IMG gene ID: 2666410909

Locus tag: Ga0109959\_1101377

**Citrobacter koseri FDAARGOS\_164**

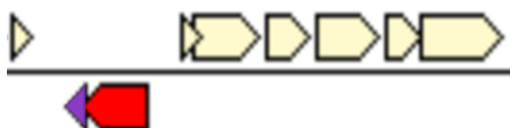

IMG gene ID: 2880325254

Locus tag: Ga0398985\_01\_330902\_332014

**Salmonella enterica salamae sv. 42:r:- RSE09**

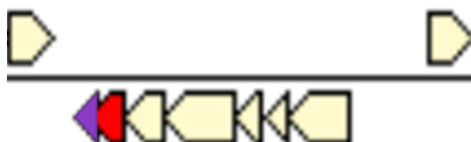

IMG gene ID: 2772053023

Locus tag: Ga0244580\_10487

**Brenneria salicis DSM 30166**

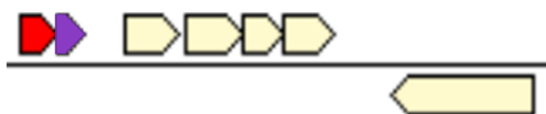

IMG gene ID: 2655006667

Locus tag: Ga0100814\_10151

**Photorhabdus heterorhabditis VMG**

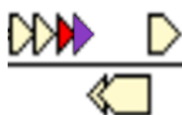

IMG gene ID: 2851087704

Locus tag: Ga0272029\_02\_457836\_458186

**Ralstonia solanacearum RSCM**

**Eh1 gene / Eh1 toxic domain** 

**Ehi1 - immunity** 

783

784 **Supplementary Figure 2. BLAST hits of Eh1 candidate extension exhibit synteny.**

785 Eh1 effector domain BLAST hits were found in various Genera, and had synteny with a  
786 downstream putative cognate immunity gene. Bottom three are standalone versions, i.e.  
787 effector domains only, without an N-terminal HCP.

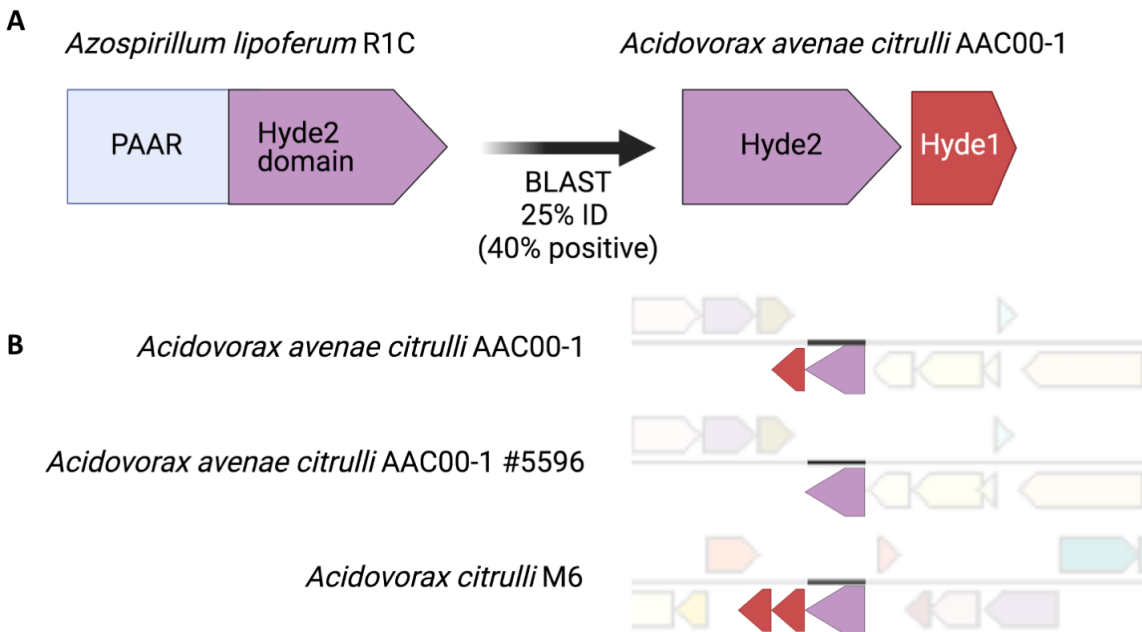

788

789 **Supplementary Figure 3. Small genes with signatures of rapid evolution encoded next to T6SS**  
790 **adaptors are putative effector toxins.** (A) An example of a C-terminal core domain, Hyde2 (pale  
791 blue), connected to an N-terminal PAAR domain (purple), which has a standalone version next  
792 to small gene, Hyde1, that is toxic to *E. coli* (Levy et al. 2017). (B) Three loci from closely related  
793 species that encode Hyde2 orthologs (purple) and their associated Hyde1 orthologs (red)  
794 display copy number variation, a sign of rapid evolution.  
795

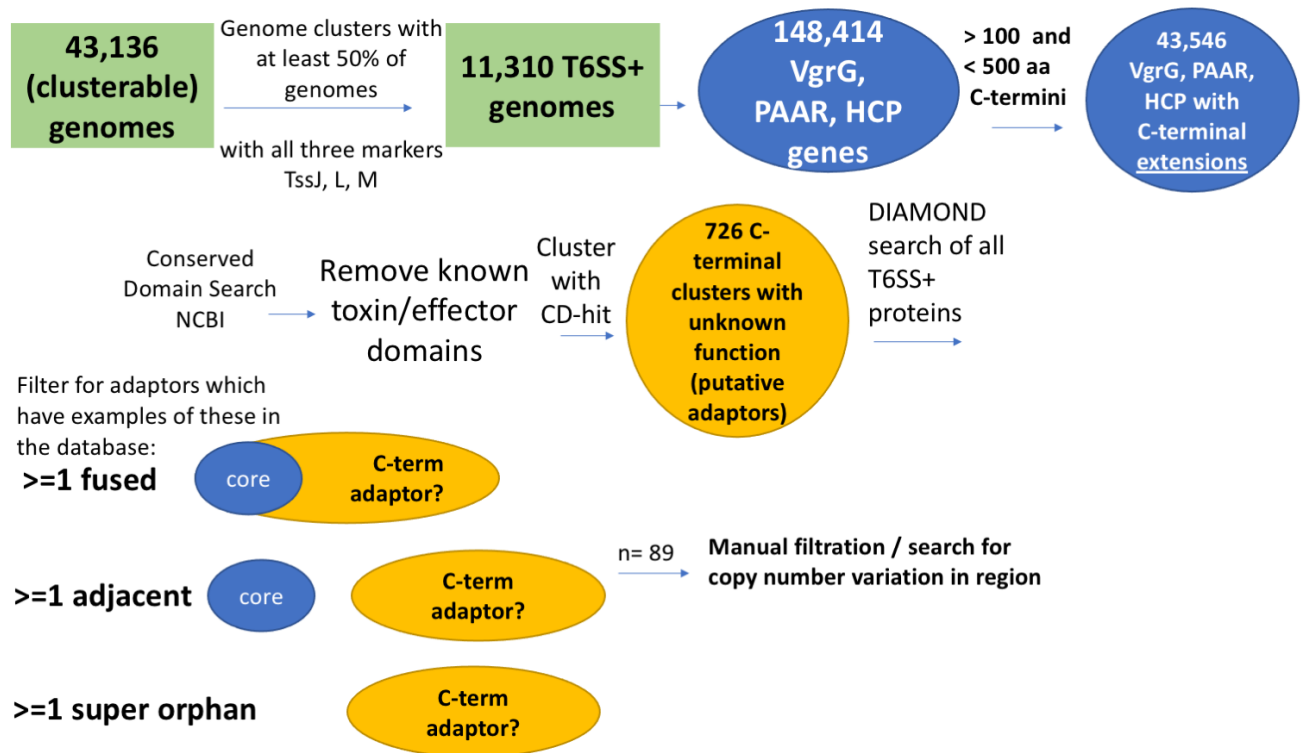

796

797 **Supplementary Figure 4. Rapid evolution algorithm.** Genomes with known pairwise ANI values  
 798 were filtered for the presence of T6SS marker domains TssJ, L, and M. In those genomes, genes  
 799 with marker domains for core T6SS genomes were identified, and filtered for those with  
 800 extensions >100 amino acids and <500 amino acids. C-terminal domains with annotations for  
 801 known toxic/effector domains were removed. C-termini were clustered and representatives  
 802 were used for search for standalone versions of the putative adaptors in other genomes. Those  
 803 with orphan and super orphan forms were chosen and screened for copy number variation.  
 804 Selected candidates were synthesized and cloned into inducible vectors and tested for toxicity  
 805 by heterologous expression.

806

807

808

809

810

## *Pseudomonas syringae* pv. tomato DC3000 IMG genome ID = 2508866418

Gene(s) tested in this study:

IMG gene ID = 2508866418

Locus tag = PSPTOimg\_00004890

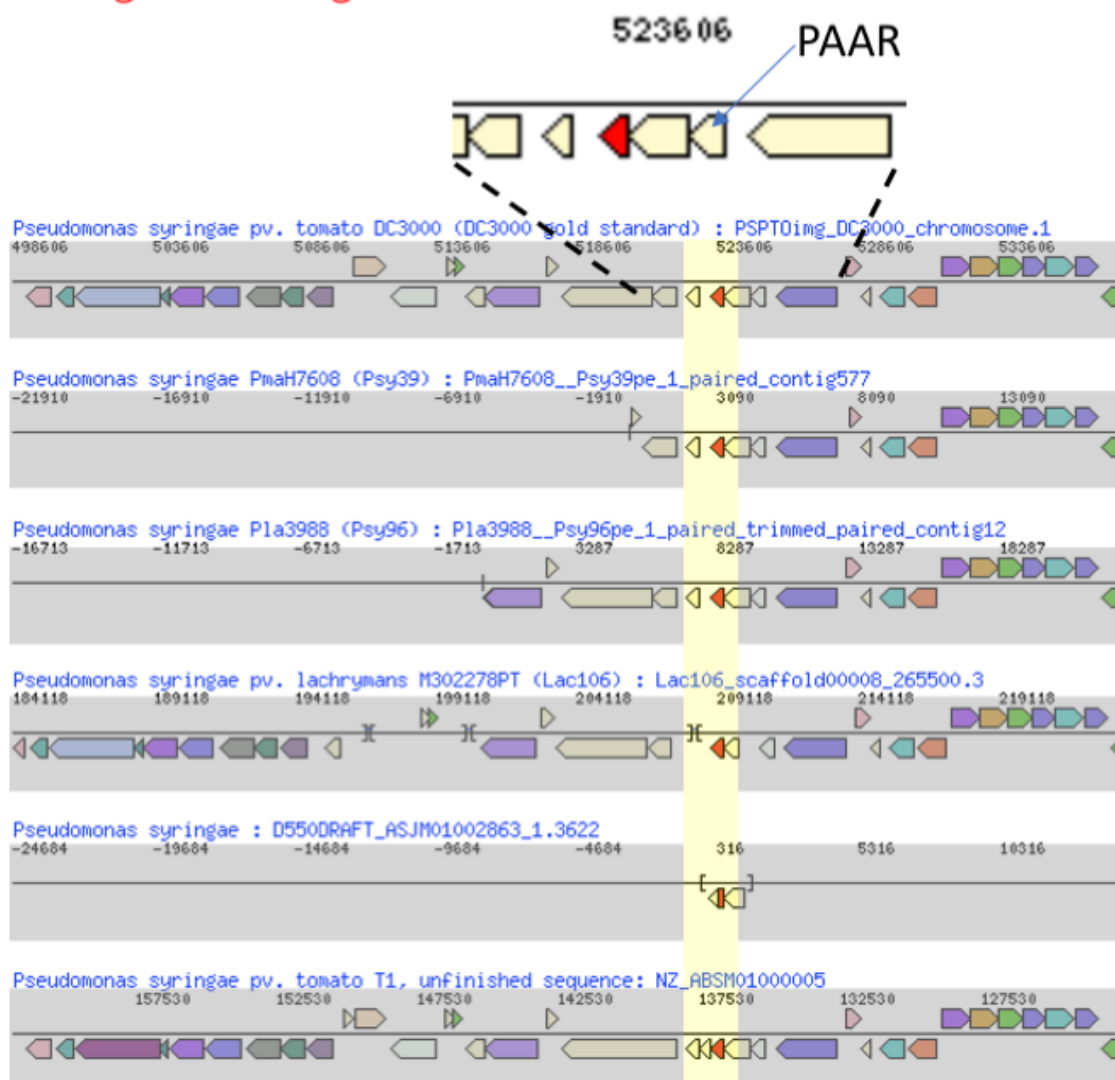

811  
812 **Supplementary Figure 5. Rapid evolution of putative T6E PSPTOimg\_00004890.** The gene  
813 tested in this study (top, red) has a PAAR in its orphan operon. Upon looking at closely related  
814 orthologs, we see copy number variation of the red gene in the same locus (the area of  
815 duplication and deletion is highlighted in yellow).  
816

817

## ***Burkholderia cepacia* 383** **IMG genome ID = 637000051**

Gene(s) tested in this study:

IMG gene ID = 637766623

Locus tag = Bcep18194\_B1774

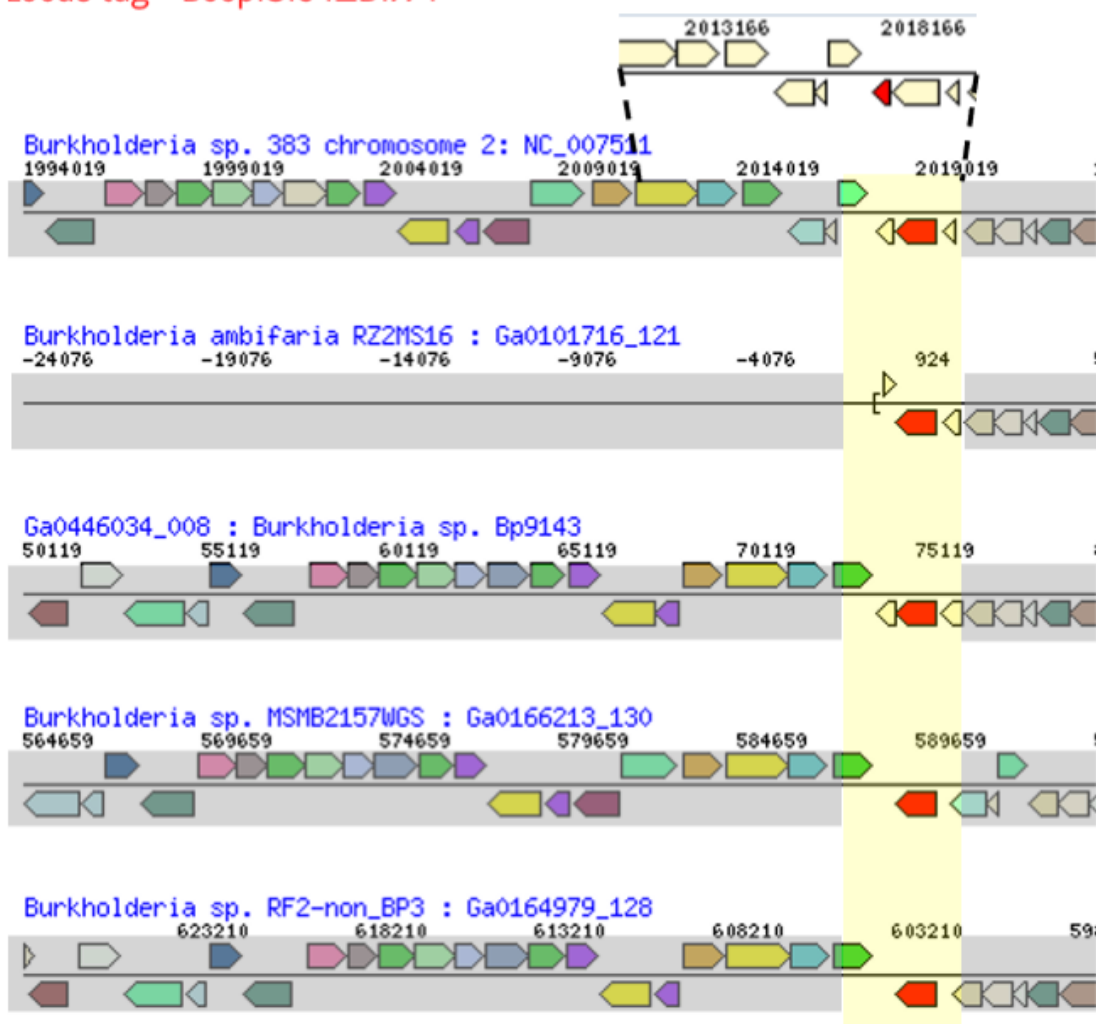

818

819 **Supplementary Figure 6. Rapid evolution of putative T6E Bcep18194\_B1774.** The gene tested  
820 in this study (top, red) is encoded in a “super orphan” locus, i.e. with no T6SS cores in the area.  
821 Upon looking at closely related orthologs of the adjacent putative adaptor (bottom), we see  
822 copy number variation of the putative T6E gene in the same locus (highlighted yellow).

***Photobacterium laumondii* TTO1**  
**IMG genome ID = 637000207**

Gene(s) tested in this study:

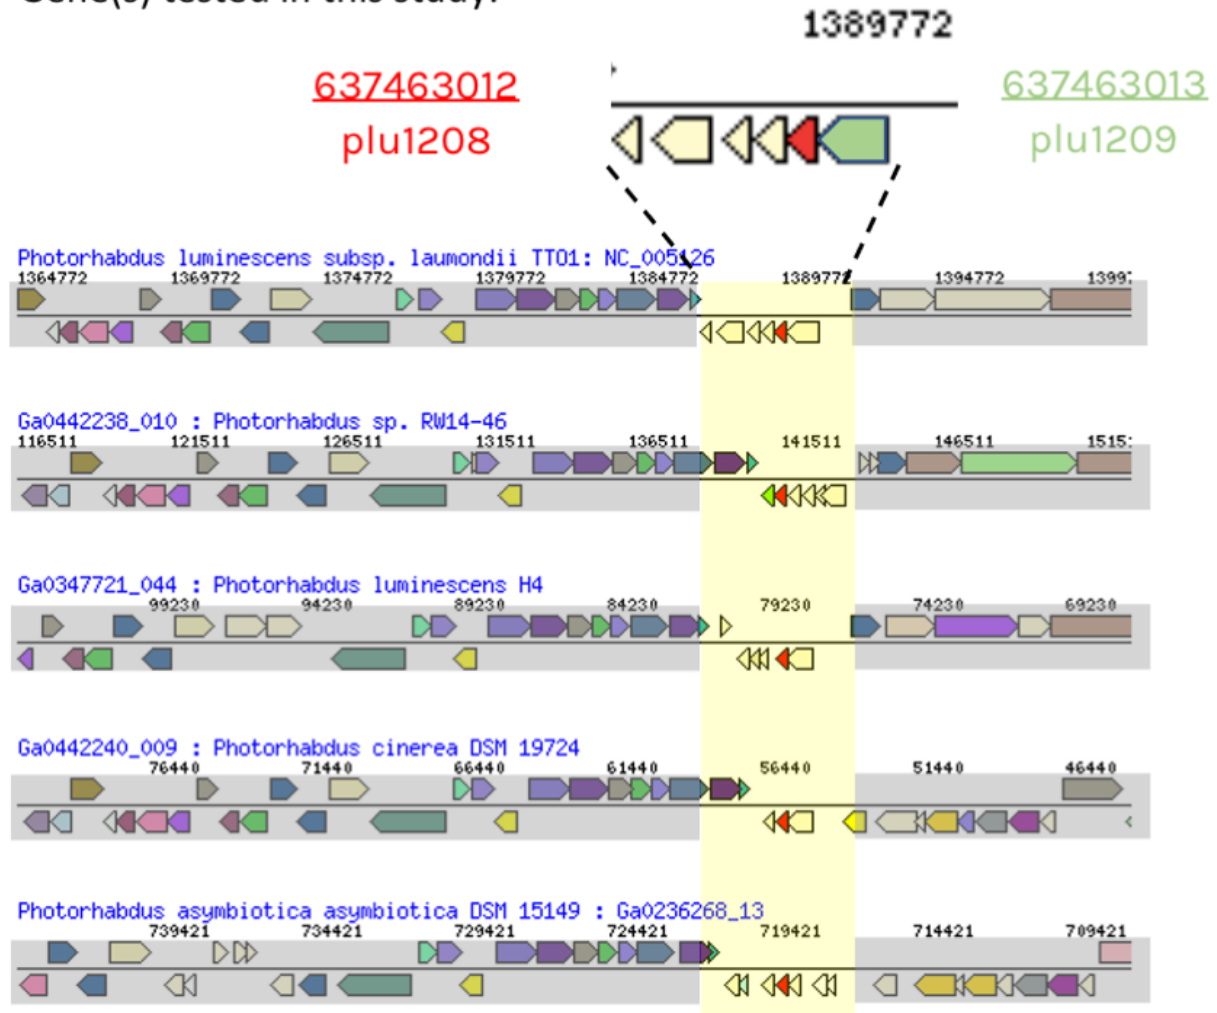

823

824 **Supplementary Figure 7. Rapid evolution of putative T6E *plu1208*.** The genes tested in this  
825 study (top, red and green) are encoded in a "super orphan" locus, i.e. with no T6SS cores in the  
826 area. Upon looking at closely related orthologs of the adjacent putative adaptor (bottom), we  
827 see copy number variation of genes in the same locus (highlighted yellow).

828

***Photorhabdus laumondii* TTO1**  
**IMG genome ID = 637000207**

Gene(s) tested in this study:

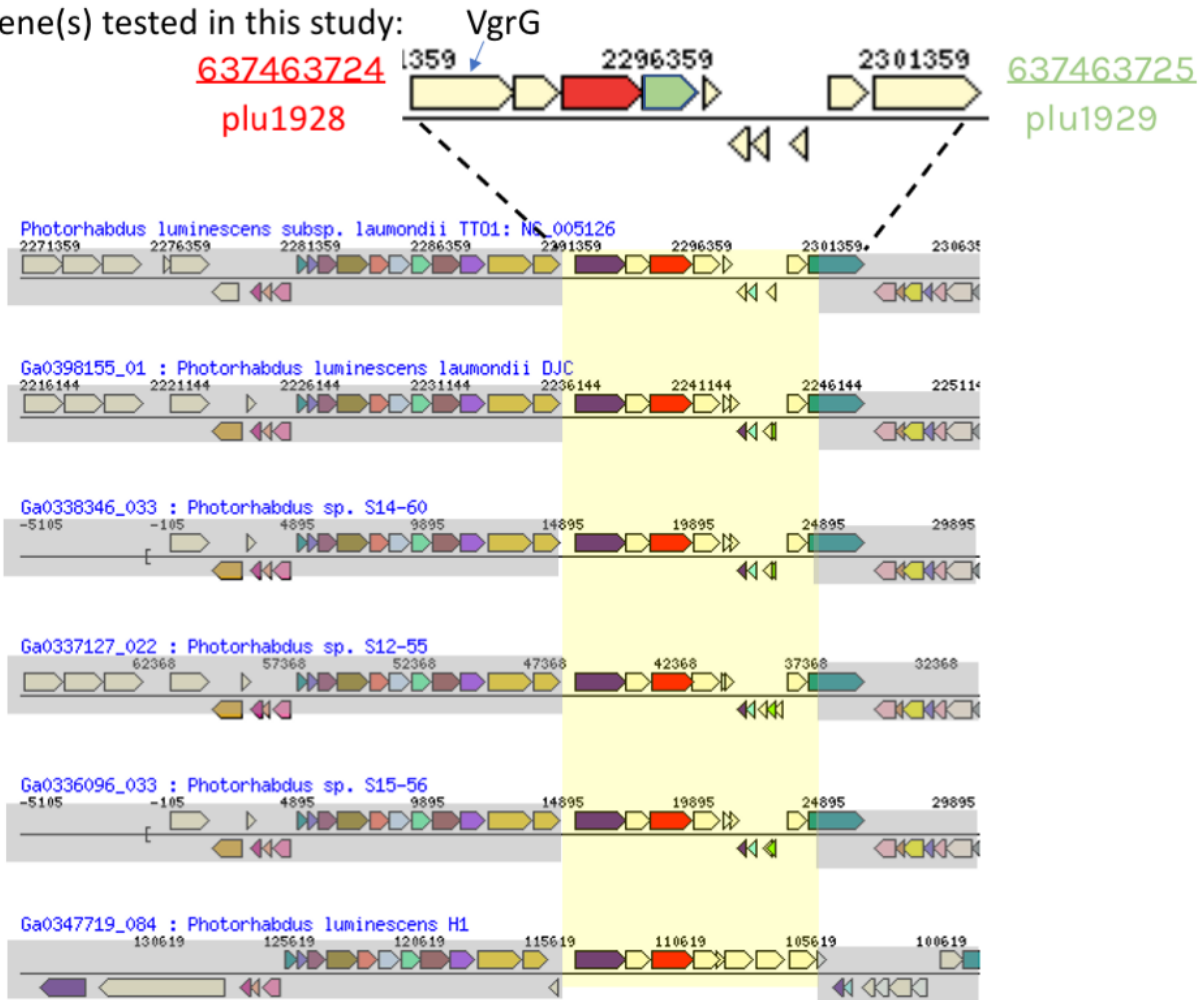

829

830 **Supplementary Figure 8. Rapid evolution of putative T6E plu1929.** The genes tested in this  
831 study (top, red and green) are encoded next to a VgrG gene (T6SS core gene). Upon looking at  
832 closely related orthologs of the adjacent putative adaptor (bottom), we see copy number  
833 variation of genes in the same locus (highlighted yellow). Namely, orthologs of plu1929 can be  
834 found in up to four copies in the last genome in the row.

***Pectobacterium wasabiae* CFBP 3304**

IMG genome ID = 2537561728

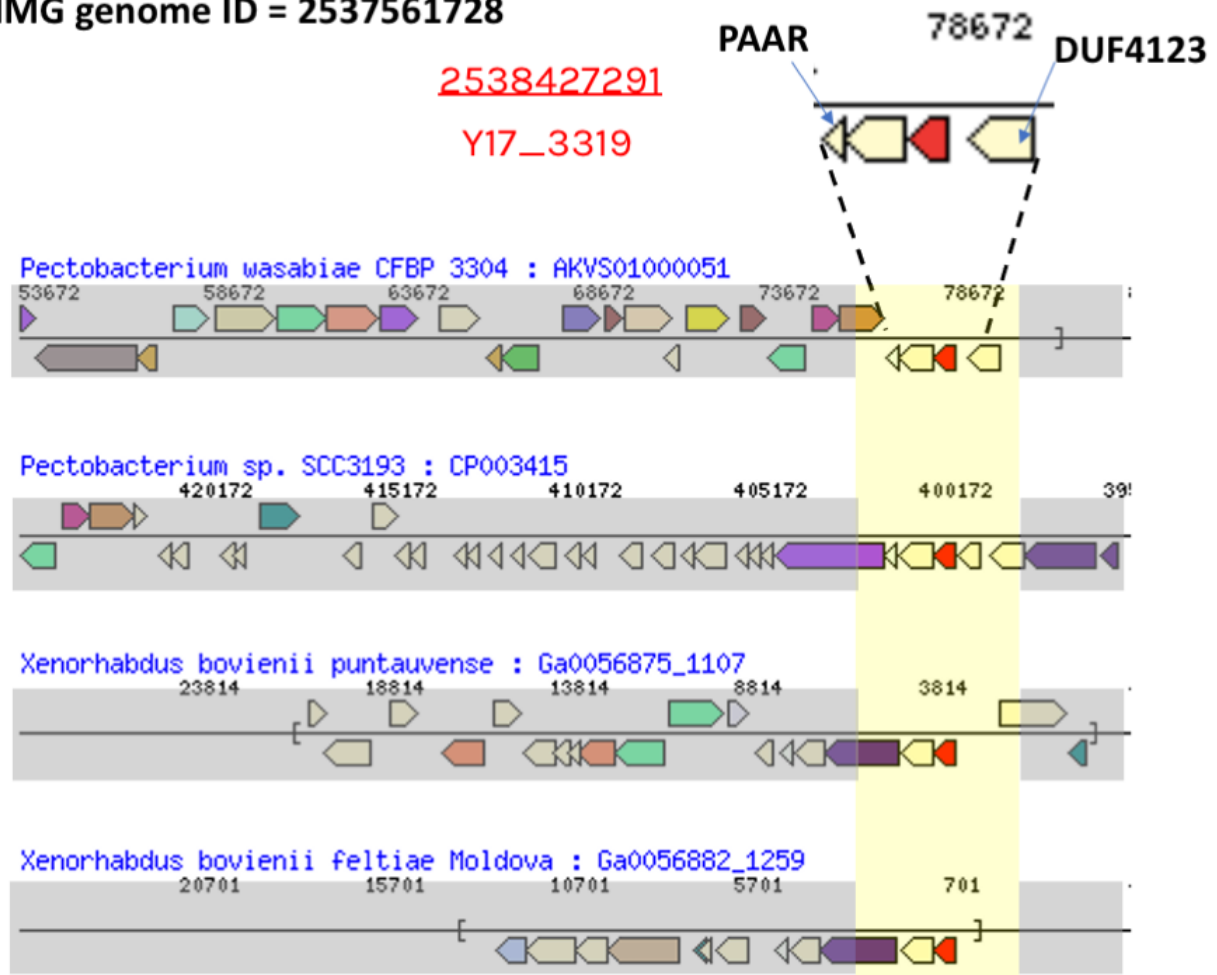

835

836 **Supplementary Figure 9. Rapid evolution of putative T6E Y17\_3319.** The gene tested in this  
837 study (top, red) is encoded in an orphan operon with T6SS core PAAR and known adaptor  
838 DUF4123 in the operon. Upon looking at closely related orthologs of the adjacent putative  
839 adaptor (bottom), we see copy number variation of the gene in the same locus (highlighted  
840 yellow).



***Aeromonas piscicola* LMG 24783**  
**IMG genome ID = 2648501384**

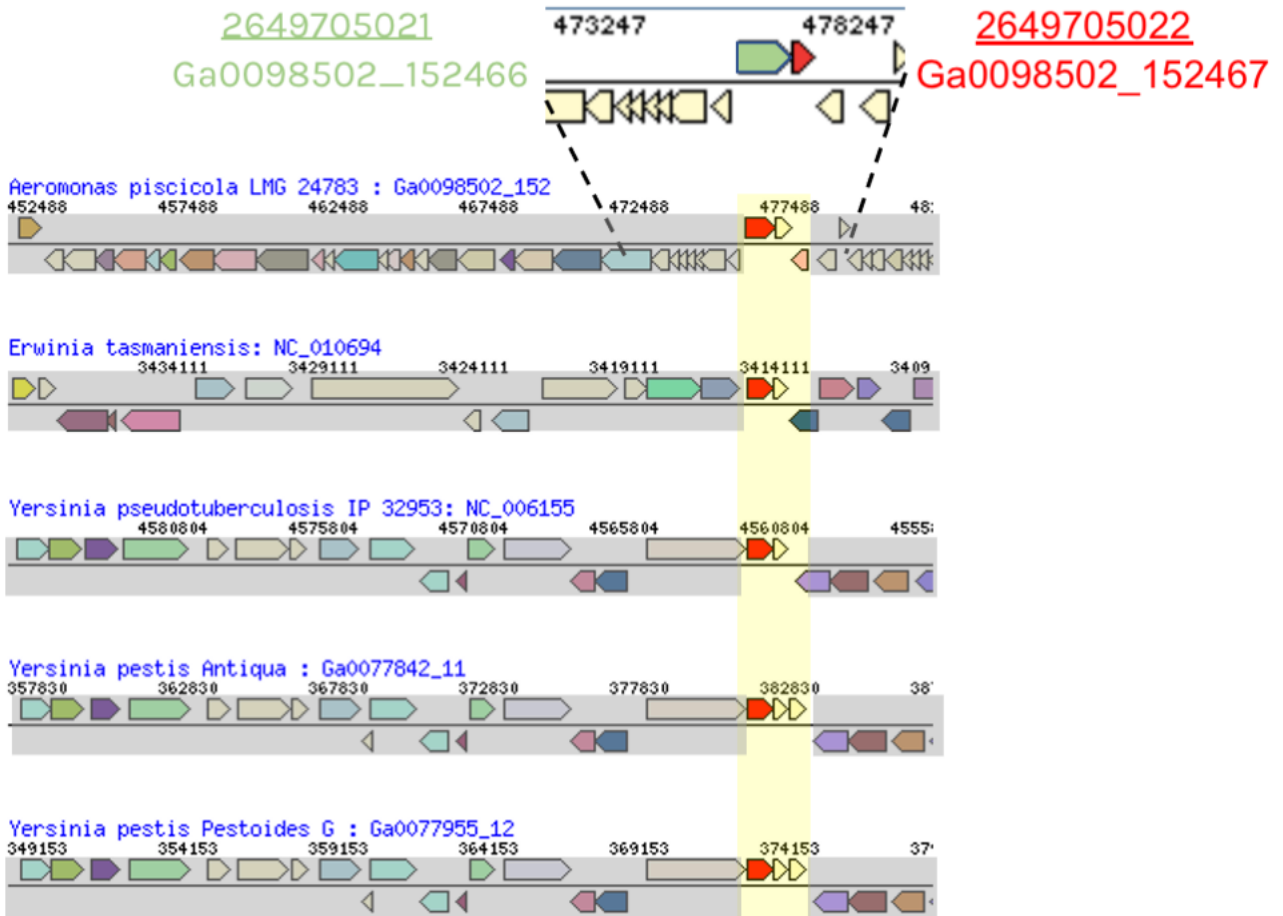

841  
842 **Supplementary Figure 10. Rapid evolution of putative T6E Ga0098502\_152467.** The genes  
843 tested in this study (top, red and green) are encoded in a “super orphan” locus, i.e. with no  
844 T6SS cores in the area. Upon looking at closely related orthologs of the adjacent putative  
845 adaptor (bottom), we see copy number variation of genes in the same locus (highlighted  
846 yellow).

***Klebsiella oxytoca* KCTC 1686**  
**IMG genome ID = 2511231124**

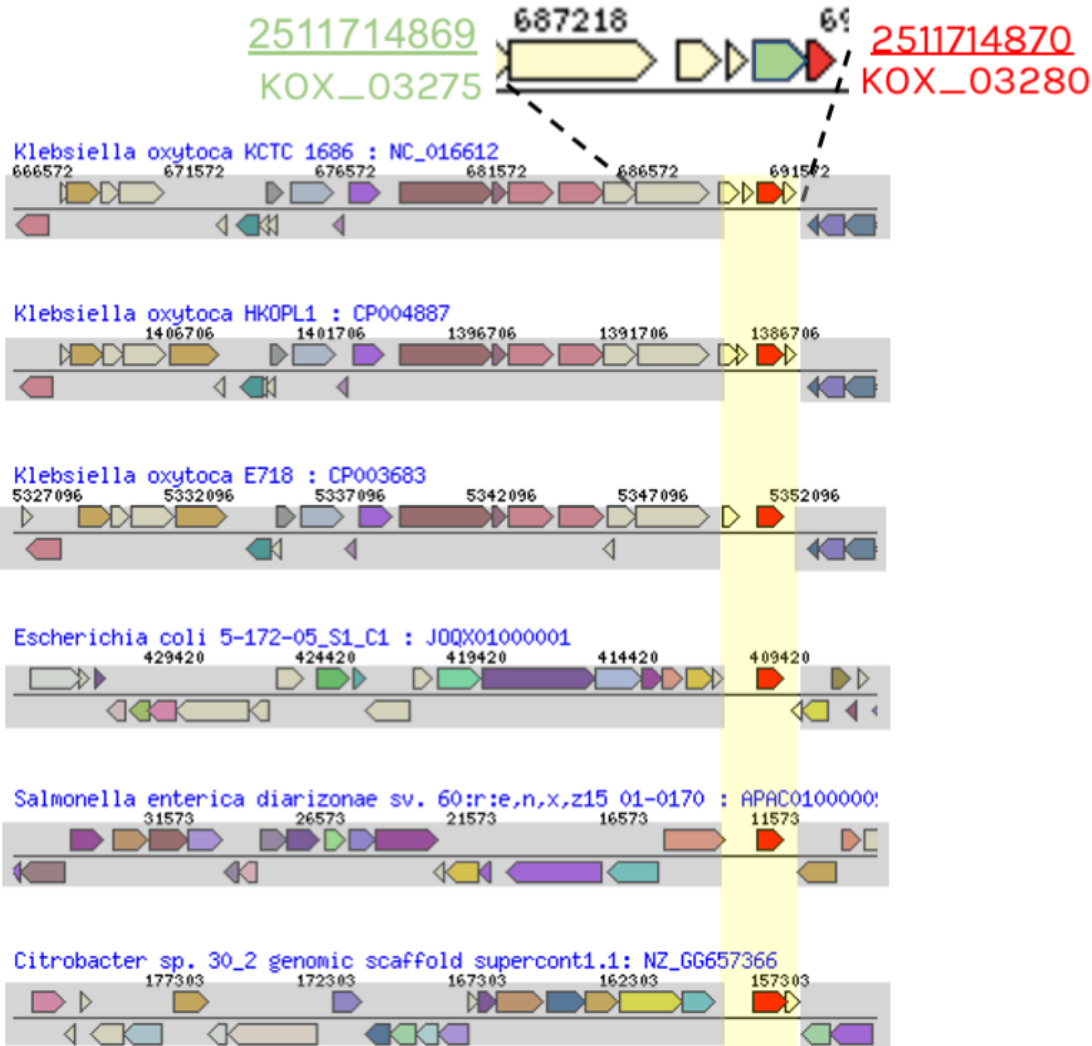

847

848 **Supplementary Figure 11. Rapid evolution of putative T6E KOX\_03280.** The genes tested in  
849 this study (top, red and green) are encoded in a “super orphan” locus, i.e. with no T6SS cores in  
850 the area. Upon looking at closely related orthologs of the adjacent putative adaptor (bottom),  
851 we see copy number variation of genes in the same locus (highlighted yellow). Note that both  
852 the putative adaptor and putative T6E were toxic to *E. coli*, in this case.

***Pseudomonas extremaustralis* 14-3 sub14-3b**  
IMG genome ID = 2548876812

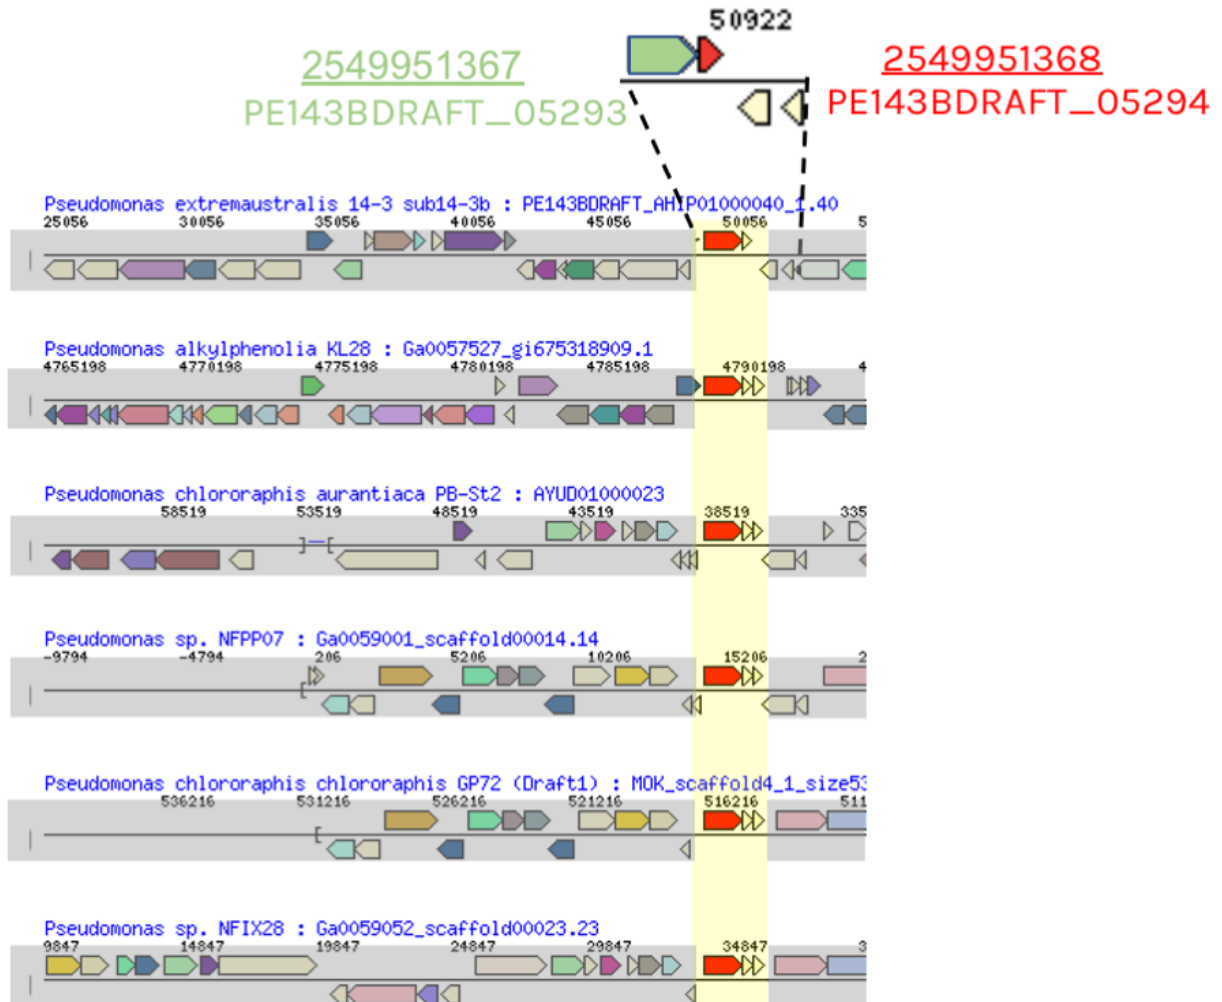

853

854 **Supplementary Figure 12. Rapid evolution of putative T6E PE143BDRAFT\_05294.** The genes  
855 tested in this study (top, red and green) are encoded in a “super orphan” locus, i.e. with no  
856 T6SS cores in the area. Upon looking at closely related orthologs of the adjacent putative  
857 adaptor (bottom), we see copy number variation of genes in the same locus (highlighted  
858 yellow).

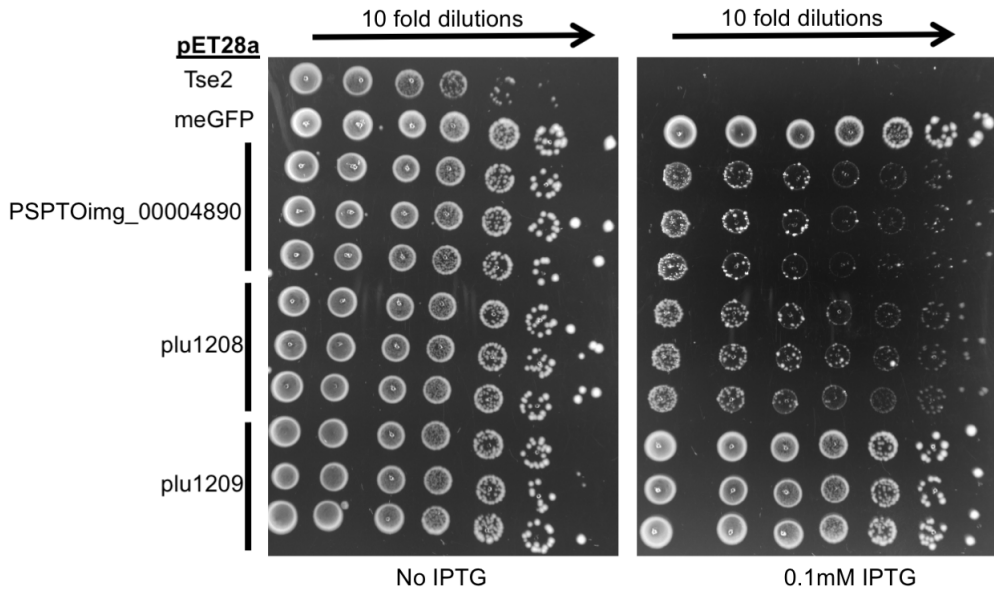

859

860 **Supplementary Figure 13. Putative T6Es PSPTOimg\_00004890 and plu1208 are toxic to *E. coli*,**  
861 **while putative adaptor plu1209 is not.** Negative controls gene meGFP, or positive control gene,  
862 known toxin Tse2 (Hood et al. 2010), or putative T6Es and adaptors were cloned into pET28a  
863 plasmids, and transformed into *E. coli* BL21 (DE3) pLysS. Colonies were grown overnight, and  
864 were normalized and serially ten fold diluted and dropped onto agar plates in normal (left) and  
865 inducing 0.1mM IPTG (right).

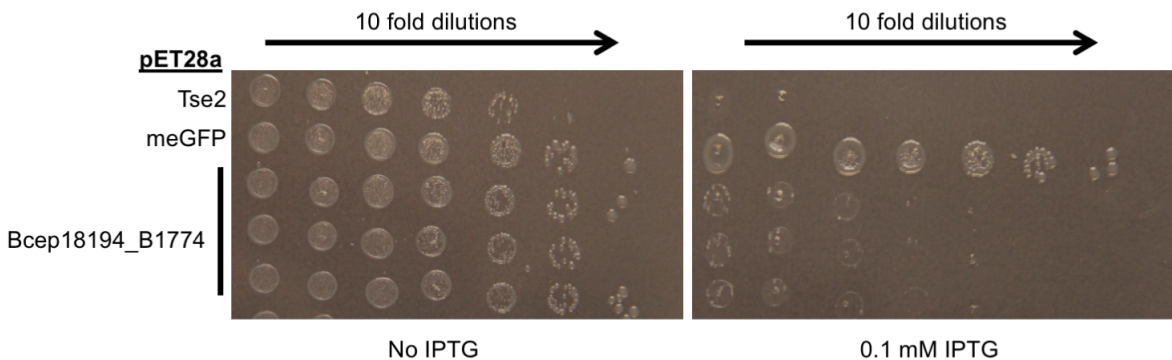

866

867 **Supplementary Figure 14. Putative T6E Bcep18194\_B1774 is toxic to *E. coli*.** Negative controls  
868 gene meGFP, or positive control gene, known toxin Tse2 (Hood et al. 2010), or putative T6E  
869 Bcep18194\_B1774 was cloned into pET28a plasmids, and transformed into *E. coli* BL21 (DE3)  
870 pLysS. Colonies were grown overnight, and were normalized and serially ten fold diluted and  
871 dropped onto agar plates in normal (left) and inducing 0.1mM IPTG (right).

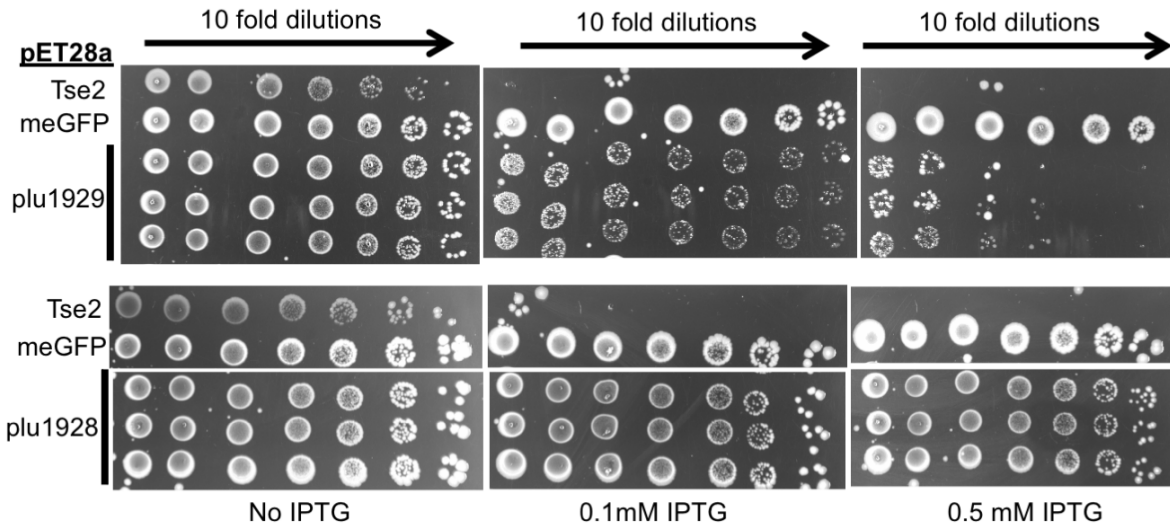

872

873

874 **Supplementary Figure 15. Putative T6E plu1929 is toxic to *E. coli*, while putative adaptor**  
875 **plu1928 is not.** Negative controls gene meGFP, or positive control gene, known toxin Tse2  
876 (Hood et al. 2010), or putative T6E plu1929 and putative adaptor plu1928 were cloned into  
877 pET28a plasmids, and transformed into *E. coli* BL21 (DE3) pLysS. Colonies were grown  
878 overnight, and were normalized and serially ten fold diluted and dropped onto agar plates in  
879 normal (left) and inducing 0.1mM IPTG (middle), and 0.5 mM IPTG (right). This higher  
880 concentration of IPTG shows putative T6E toxicity, while maintaining putative adaptor non-  
881 toxicity, demonstrating specificity.

882

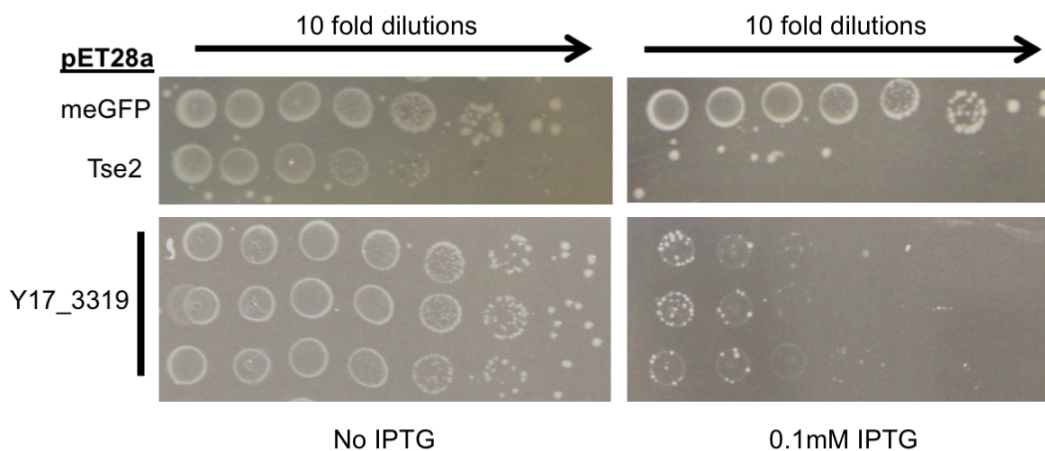

883

884 **Supplementary Figure 16. Putative T6E Y17\_3319 is toxic to *E. coli*.** Negative controls gene  
885 meGFP, or positive control gene, known toxin Tse2 (Hood et al. 2010), or putative T6E  
886 Y17\_3319 was cloned into pET28a plasmids, and transformed into *E. coli* BL21 (DE3) pLysS.

887 Colonies were grown overnight, and were normalized and serially ten fold diluted and dropped  
888 onto agar plates in normal (left) and inducing 0.1mM IPTG (right).  
889  
890

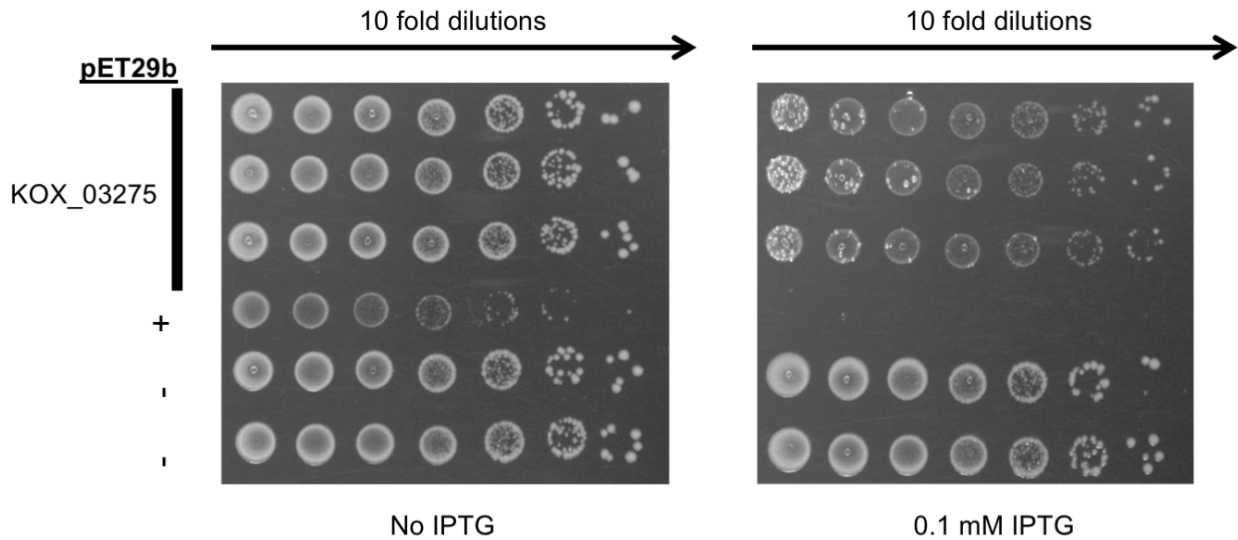

891  
892 **Supplementary Figure 17. Putative adaptor KOX\_03275 is toxic to *E. coli*.** Empty pET29b  
893 plasmids (-), or pET29b cloned with a positive control (a known toxin, +), or putative adaptor  
894 KOX\_03275 were transformed into *E. coli* BL21 (DE3). Colonies were grown overnight, and were  
895 normalized and serially ten fold diluted and dropped onto agar plates in normal (left) and  
896 inducing 0.1mM IPTG (right).

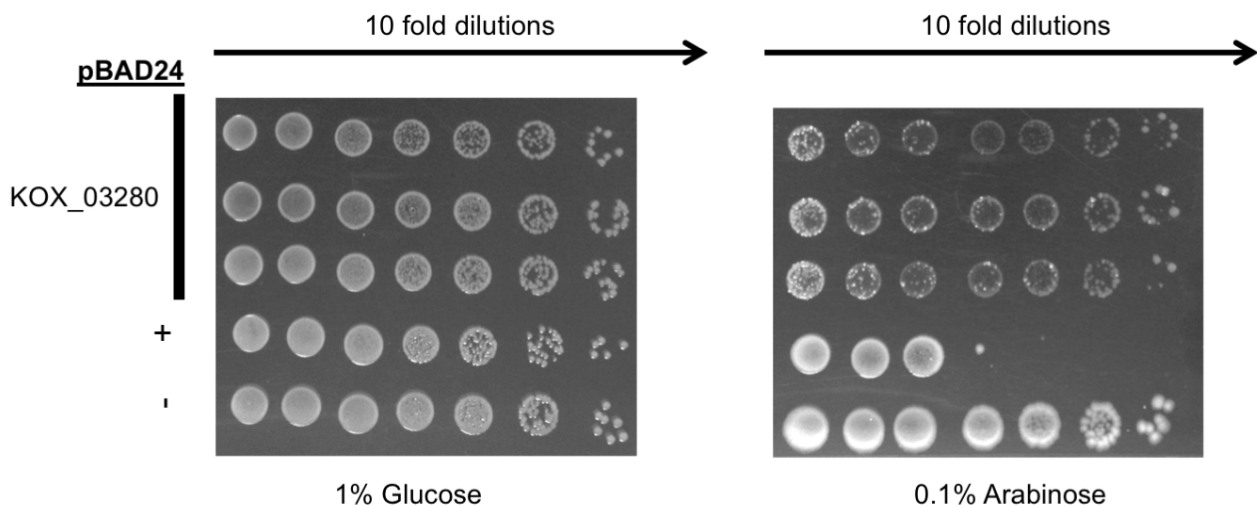

897  
898 **Supplementary Figure 18. Putative T6E KOX\_03280 is toxic to *E. coli*.** Empty pBAD24 plasmids  
899 (-), or positive control (a known toxin, +), or putative T6E KOX\_03280 was transformed into *E.*  
900 *coli* BL21 (DE3). Colonies were grown overnight, and were normalized and serially ten fold

901 diluted and dropped onto agar plates with repressing 1% Glucose (left) and inducing 0.1%  
902 Arabinose (right).  
903

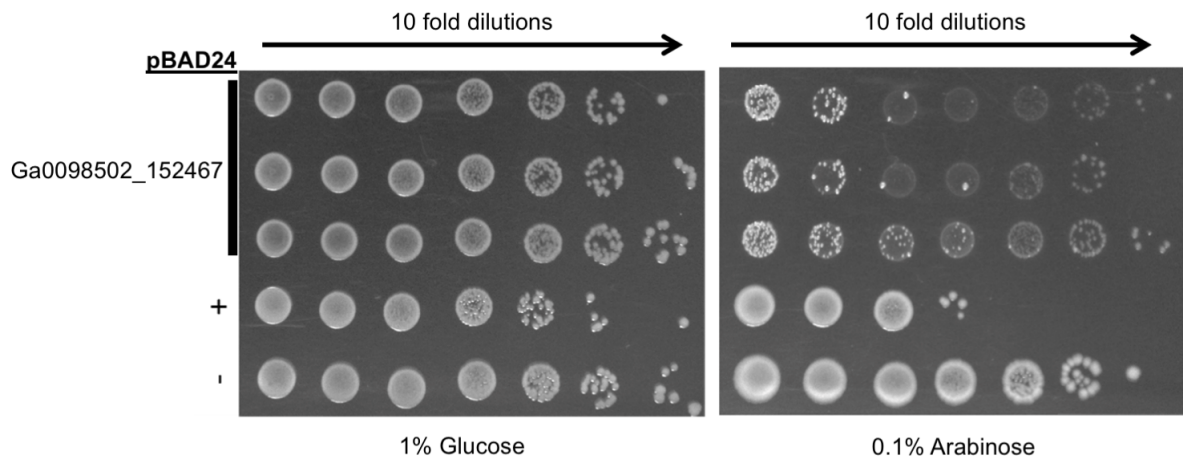

904  
905 **Supplementary Figure 19. Putative T6E Ga0098502\_152467 is toxic to *E. coli*.** Empty pBAD24  
906 plasmids (-), or positive control (a known toxin, +), or putative T6E Ga0098502\_152467 were  
907 transformed into *E. coli* BL21 (DE3). Colonies were grown overnight, and were normalized and  
908 serially ten fold diluted and dropped onto agar plates with repressing 1% Glucose (left) and  
909 inducing 0.1% Arabinose (right).  
910

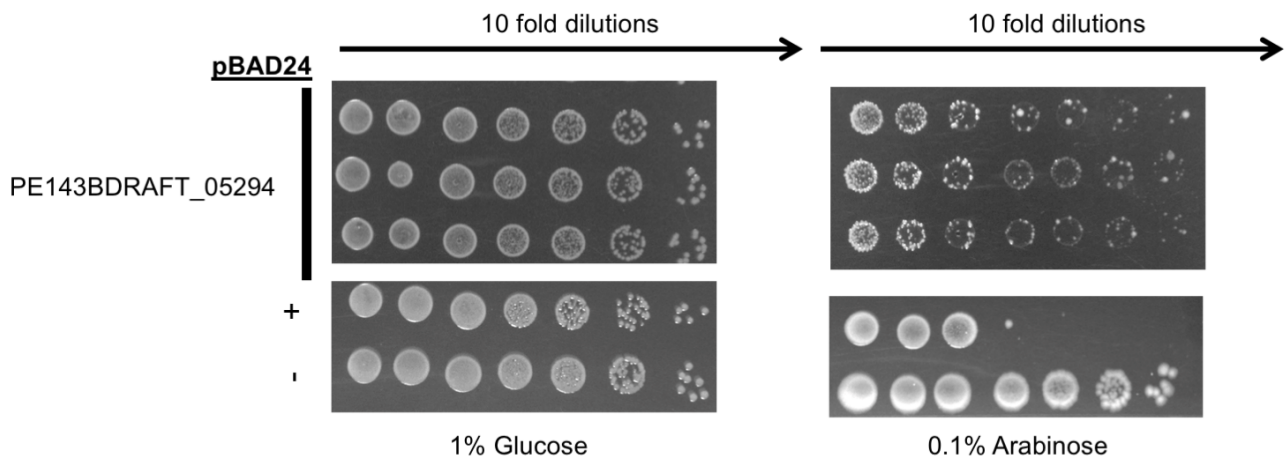

911  
912 **Supplementary Figure 20. Putative T6E PE143BDRAFT\_05294 is toxic to *E. coli*.** Empty pBAD24  
913 plasmids (-), or positive control (a known toxin, +), or putative T6E PE143BDRAFT\_05294 were  
914 transformed into *E. coli* BL21 (DE3) pLysS. Colonies were grown overnight, and were normalized  
915 and serially ten fold diluted and dropped onto agar plates with repressing 1% Glucose (left) and  
916 inducing 0.1% Arabinose (right).

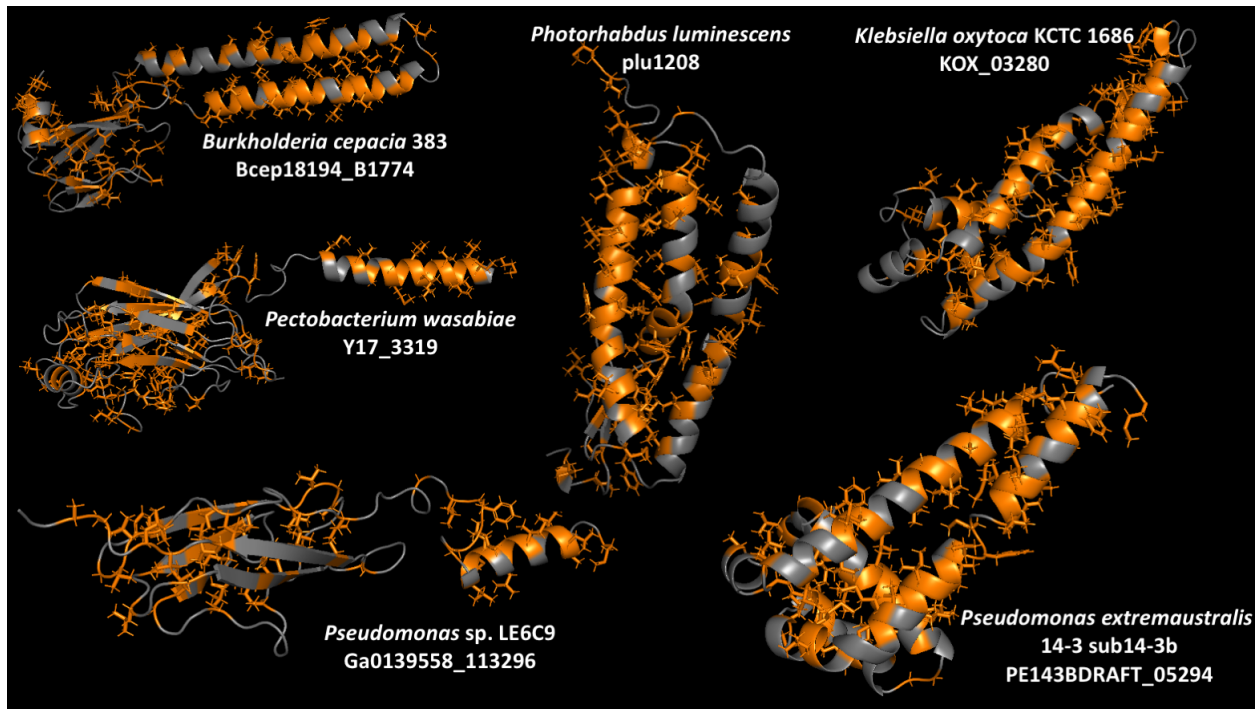

917

918 **Supplementary Figure 21. T6Es with toxic activity in *E. coli* that have hydrophobic domains.**

919 Structures predicted by Robetta's RoseTTAFold (Baek et al. 2021) of toxic putative T6Es with  
920 transmembrane domains as determined by IMG annotation (Markowitz et al. 2012; I.-M. A.  
921 Chen et al. 2017, 2019). Hydrophobic amino acids are highlighted in orange.

922

923 **Acknowledgements**

924 The authors thank Noam Dotan for help with phylogenetic trees and scripting. AL is  
925 generously supported by the Israeli Science Foundation (Grants #1535/20, #3300/20),  
926 Alon Fellowship of the Israeli council of higher education, The Hebrew University -  
927 University of Illinois Urbana-Champaign seed grant, the Israeli Ministry of Agriculture  
928 (Grant 12-12-0002), and ICA in Israel. AMG is generously supported by the Kaete  
929 Klausner Scholarship and was supported by a scholarship from the Israeli Ministry of  
930 Aliyah and Integration.

931

932 **References**

933 Alcoforado Diniz, Juliana, Yi-Chia Liu, and Sarah J. Coulthurst. 2015. "Molecular  
934 Weaponry: Diverse Effectors Delivered by the Type VI Secretion System." *Cellular*  
935 *Microbiology* 17 (12): 1742–51.  
936 Anderson, Mark C., Pascale Vonaesch, Azadeh Saffarian, Benoit S. Marteyn, and



- 937 Philippe J. Sansonetti. 2017. “Shigella Sonnei Encodes a Functional T6SS Used for  
938 Interbacterial Competition and Niche Occupancy.” *Cell Host & Microbe* 21 (6): 769–  
939 76.e3.
- 940 Baek, Minkyung, Frank DiMaio, Ivan Anishchenko, Justas Dauparas, Sergey  
941 Ovchinnikov, Gyu Rie Lee, Jue Wang, et al. 2021. “Accurate Prediction of Protein  
942 Structures and Interactions Using a Three-Track Neural Network.” *Science* 373  
943 (6557): 871–76.
- 944 Beaz-Hidalgo, R., A. Alperi, M. J. Figueras, and J. L. Romalde. 2009. “Aeromonas  
945 Piscicola Sp. Nov., Isolated from Diseased Fish.” *Systematic and Applied*  
946 *Microbiology* 32 (7): 471–79.
- 947 Bingle, Lewis Eh, Christopher M. Bailey, and Mark J. Pallen. 2008. “Type VI Secretion:  
948 A Beginner’s Guide.” *Current Opinion in Microbiology* 11 (1): 3–8.
- 949 Boyer, Frédéric, Gwennaële Fichant, Jérémie Berthod, Yves Vandenbrouck, and Ina  
950 Attree. 2009. “Dissecting the Bacterial Type VI Secretion System by a Genome  
951 Wide in Silico Analysis: What Can Be Learned from Available Microbial Genomic  
952 Resources?” *BMC Genomics* 10 (March): 104.
- 953 Brooks, Teresa M., Daniel Unterweger, Verena Bachmann, Benjamin Kostiuik, and  
954 Stefan Pukatzki. 2013. “Lytic Activity of the Vibrio Cholerae Type VI Secretion  
955 Toxin VgrG-3 Is Inhibited by the Antitoxin TsaB.” *The Journal of Biological*  
956 *Chemistry* 288 (11): 7618–25.
- 957 Brynildsrud, Ola, Jon Bohlin, Lonneke Scheffer, and Vegard Eldholm. 2016. “Erratum to:  
958 Rapid Scoring of Genes in Microbial Pan-Genome-Wide Association Studies with  
959 Scoary.” *Genome Biology* 17 (1): 262.
- 960 Buchfink, Benjamin, Klaus Reuter, and Hajk-Georg Drost. 2021. “Sensitive Protein  
961 Alignments at Tree-of-Life Scale Using DIAMOND.” *Nature Methods* 18 (4): 366–  
962 68.
- 963 Buchfink, Benjamin, Chao Xie, and Daniel H. Huson. 2015. “Fast and Sensitive Protein  
964 Alignment Using DIAMOND.” *Nature Methods* 12 (1): 59–60.
- 965 Camacho, Christiam, George Coulouris, Vahram Avagyan, Ning Ma, Jason  
966 Papadopoulos, Kevin Bealer, and Thomas L. Madden. 2009. “BLAST+:  
967 Architecture and Applications.” *BMC Bioinformatics* 10 (1): 421.
- 968 Capella-Gutiérrez, Salvador, José M. Silla-Martínez, and Toni Gabaldón. 2009. “trimAl:  
969 A Tool for Automated Alignment Trimming in Large-Scale Phylogenetic Analyses.”  
970 *Bioinformatics* 25 (15): 1972–73.
- 971 Chen, I-Min A., Ken Chu, Krishna Palaniappan, Manoj Pillay, Anna Ratner, Jinghua  
972 Huang, Marcel Huntemann, et al. 2019. “IMG/M v.5.0: An Integrated Data  
973 Management and Comparative Analysis System for Microbial Genomes and  
974 Microbiomes.” *Nucleic Acids Research* 47 (D1): D666–77.
- 975 Chen, I-Min A., Victor M. Markowitz, Ken Chu, Krishna Palaniappan, Ernest Szeto,  
976 Manoj Pillay, Anna Ratner, et al. 2017. “IMG/M: Integrated Genome and  
977 Metagenome Comparative Data Analysis System.” *Nucleic Acids Research* 45  
978 (D1): D507–16.
- 979 Chen, Lihong, Nan Song, Bo Liu, Nan Zhang, Nabil-Fareed Alikhan, Zhemin Zhou,  
980 Yanyan Zhou, et al. 2019. “Genome-Wide Identification and Characterization of a  
981 Superfamily of Bacterial Extracellular Contractile Injection Systems.” *Cell Reports*  
982 29 (2): 511–21.e2.

- 983 Cianfanelli, Francesca R., Laura Monlezun, and Sarah J. Coulthurst. 2016. "Aim, Load,  
984 Fire: The Type VI Secretion System, a Bacterial Nanoweapon." *Trends in*  
985 *Microbiology* 24 (1): 51–62.
- 986 Crisan, Cristian V., Aroon T. Chande, Kenneth Williams, Vishnu Raghuram, Lavanya  
987 Rishishwar, Gabi Steinbach, Samit S. Watve, Peter Yunker, I. King Jordan, and  
988 Brian K. Hammer. 2019. "Analysis of *Vibrio Cholerae* Genomes Identifies New  
989 Type VI Secretion System Gene Clusters." *Genome Biology* 20 (1): 163.
- 990 Darby, Alison, Kvin Lertpiriyapong, Ujjal Sarkar, Uthpala Seneviratne, Danny S. Park,  
991 Eric R. Gamazon, Chara Batchelder, et al. 2014. "Cytotoxic and Pathogenic  
992 Properties of *Klebsiella Oxytoca* Isolated from Laboratory Animals." *PLoS ONE*.  
993 <https://doi.org/10.1371/journal.pone.0100542>.
- 994 Desfosses, Ambroise, Hariprasad Venugopal, Tapan Joshi, Jan Felix, Matthew Jessop,  
995 Hyengseop Jeong, Jaekyung Hyun, et al. 2019. "Atomic Structures of an Entire  
996 Contractile Injection System in Both the Extended and Contracted States." *Nature*  
997 *Microbiology* 4 (11): 1885–94.
- 998 Deveci, Aydin, and Ahmet Yilmaz Coban. 2014. "Optimum Management of *Citrobacter*  
999 *Koseri* Infection." *Expert Review of Anti-Infective Therapy* 12 (9): 1137–42.
- 1000 Donato, Sonya L., Christina M. Beck, Fernando Garza-Sánchez, Steven J. Jensen,  
1001 Zachary C. Ruhe, David A. Cunningham, Ian Singleton, David A. Low, and  
1002 Christopher S. Hayes. 2020. "The  $\beta$ -Encapsulation Cage of Rearrangement  
1003 Hotspot (Rhs) Effectors Is Required for Type VI Secretion." *Proceedings of the*  
1004 *National Academy of Sciences of the United States of America*, December.  
1005 <https://doi.org/10.1073/pnas.1919350117>.
- 1006 Dörr, N. C. D., and M. Blokesch. 2018. "Bacterial Type VI Secretion System Facilitates  
1007 Niche Domination." *Proceedings of the National*.  
1008 <https://www.pnas.org/content/115/36/8855.short>.
- 1009 Ericson, Charles F., Fabian Eisenstein, João M. Medeiros, Kyle E. Malter, Giselle S.  
1010 Cavalcanti, Robert W. Zeller, Dianne K. Newman, Martin Pilhofer, and Nicholas J.  
1011 Shikuma. 2019. "A Contractile Injection System Stimulates Tubeworm  
1012 Metamorphosis by Translocating a Proteinaceous Effector." *eLife* 8 (September).  
1013 <https://doi.org/10.7554/eLife.46845>.
- 1014 Flaugnatti, Nicolas, Sandrine Isaac, Leonardo F. Lemos Rocha, Sandrine Stutzmann,  
1015 Olaya Rendueles, Candice Stoudmann, Nina Vesel, et al. 2021. "Human  
1016 Commensal Gut Proteobacteria Withstand Type VI Secretion Attacks through  
1017 Immunity Protein-Independent Mechanisms." *Nature Communications* 12 (1): 5751.
- 1018 Fu, Limin, Beifang Niu, Zhengwei Zhu, Sitao Wu, and Weizhong Li. 2012. "CD-HIT:  
1019 Accelerated for Clustering the next-Generation Sequencing Data." *Bioinformatics*  
1020 28 (23): 3150–52.
- 1021 Galperin, Michael Y., Yuri I. Wolf, Kira S. Makarova, Roberto Vera Alvarez, David  
1022 Landsman, and Eugene V. Koonin. 2021. "COG Database Update: Focus on  
1023 Microbial Diversity, Model Organisms, and Widespread Pathogens." *Nucleic Acids*  
1024 *Research* 49 (D1): D274–81.
- 1025 Geller, Alexander Martin, Inbal Pollin, David Zlotkin, Aleks Danov, Nimrod Nachmias,  
1026 William B. Andreopoulos, Keren Shemesh, and Asaf Levy. 2021. "The Extracellular  
1027 Contractile Injection System Is Enriched in Environmental Microbes and Associates  
1028 with Numerous Toxins." *Nature Communications* 12 (1): 3743.

- 1029 Geller, A. M., I. Pollin, D. Zlotkin, A. Danov, and N. Nachmias. 2020. “The Extracellular  
1030 Contractile Injection System Is Enriched in Environmental Microbes and Associates  
1031 with Numerous Toxins.” *bioRxiv*.  
1032 <https://www.biorxiv.org/content/10.1101/2020.09.22.308684v1.abstract>.
- 1033 Haft, Daniel H., Jeremy D. Selengut, Roland A. Richter, Derek Harkins, Malay K. Basu,  
1034 and Erin Beck. 2013. “TIGRFAMs and Genome Properties in 2013.” *Nucleic Acids  
1035 Research* 41 (Database issue): D387–95.
- 1036 Hersch, Steven J., Kevin Manera, and Tao G. Dong. 2020. “Defending against the Type  
1037 Six Secretion System: Beyond Immunity Genes.” *Cell Reports* 33 (2): 108259.
- 1038 Hersch, Steven J., Nobuhiko Watanabe, Maria Silvina Stietz, Kevin Manera, Fatima  
1039 Kamal, Brianne Burkinshaw, Linh Lam, et al. 2020. “Envelope Stress Responses  
1040 Defend against Type Six Secretion System Attacks Independently of Immunity  
1041 Proteins.” *Nature Microbiology* 5 (5): 706–14.
- 1042 Hood, Rachel D., Pragya Singh, Fosheng Hsu, Tüzün Güvener, Mike A. Carl, Rex R. S.  
1043 Trinidad, Julie M. Silverman, et al. 2010. “A Type VI Secretion System of  
1044 *Pseudomonas Aeruginosa* Targets a Toxin to Bacteria.” *Cell Host & Microbe* 7 (1):  
1045 25–37.
- 1046 Howard, Sophie A., R. Christopher D. Furniss, Dora Bonini, Himani Amin, Patricia  
1047 Paracuellos, David Zlotkin, Tiago R. D. Costa, Asaf Levy, Despoina A. I. Mavridou,  
1048 and Alain Filloux. 2021. “The Breadth and Molecular Basis of Hcp-Driven Type VI  
1049 Secretion System Effector Delivery.” *mBio* 12 (3): e0026221.
- 1050 Hurst Mark R. H., Glare Travis R., and Jackson Trevor A. 2004. “Cloning *Serratia*  
1051 *Entomophila* Antifeeding Genes—a Putative Defective Prophage Active against the  
1052 Grass Grub *Costelytra Zealandica*.” *Journal of Bacteriology* 186 (15): 5116–28.
- 1053 Jamet, Anne, and Xavier Nassif. 2015. “New Players in the Toxin Field: Polymorphic  
1054 Toxin Systems in Bacteria.” *mBio* 6 (3): e00285–15.
- 1055 Jana, Biswanath, Chaya M. Fridman, Eran Bosis, and Dor Salomon. 2019. “A Modular  
1056 Effector with a DNase Domain and a Marker for T6SS Substrates.” *Nature  
1057 Communications* 10 (1): 3595.
- 1058 Jurénas, Dukas, and Laure Journet. 2021. “Activity, Delivery, and Diversity of Type VI  
1059 Secretion Effectors.” *Molecular Microbiology* 115 (3): 383–94.
- 1060 Kim, Hye-Sook, Bing Ma, Nicole T. Perna, and Amy O. Charkowski. 2009. “Phylogeny  
1061 and Virulence of Naturally Occurring Type III Secretion System-Deficient  
1062 *Pectobacterium* Strains.” *Applied and Environmental Microbiology* 75 (13): 4539–  
1063 49.
- 1064 LaCourse, Kaitlyn D., S. Brook Peterson, Hemantha D. Kulasekara, Matthew C. Radey,  
1065 Jungyun Kim, and Joseph D. Mougous. 2018. “Conditional Toxicity and Synergy  
1066 Drive Diversity among Antibacterial Effectors.” *Nature Microbiology* 3 (4): 440–46.
- 1067 Le, Nguyen-Hung, Katharina Peters, Akbar Espailat, Jessica R. Sheldon, Joe Gray,  
1068 Gisela Di Venanzio, Juvenal Lopez, et al. 2020. “Peptidoglycan Editing Provides  
1069 Immunity to *Acinetobacter Baumannii* during Bacterial Warfare.” *Science Advances*  
1070 6 (30): eabb5614.
- 1071 Letunic, Ivica, and Peer Bork. 2019. “Interactive Tree Of Life (iTOL) v4: Recent Updates  
1072 and New Developments.” *Nucleic Acids Research* 47 (W1): W256–59.
- 1073 Levy, Asaf, Isai Salas Gonzalez, Maximilian Mittelviehhaus, Scott Clingenpeel, Sur  
1074 Herrera Paredes, Jiamin Miao, Kunru Wang, et al. 2017. “Genomic Features of

- 1075 Bacterial Adaptation to Plants.” *Nature Genetics* 50 (1): 138–50.
- 1076 Liang, X., R. Moore, and M. Wilton. 2015. “Identification of Divergent Type VI Secretion  
1077 Effectors Using a Conserved Chaperone Domain.” *Proceedings of the*  
1078 <https://www.pnas.org/content/112/29/9106.short>.
- 1079 Lien, Yun-Wei, and Erh-Min Lai. 2017. “Type VI Secretion Effectors: Methodologies and  
1080 Biology.” *Frontiers in Cellular and Infection Microbiology* 7 (June): 254.
- 1081 Li, Jun, Yufeng Yao, H. Howard Xu, Limin Hao, Zixin Deng, Kumar Rajakumar, and  
1082 Hong-Yu Ou. 2015. “SecReT6: A Web-Based Resource for Type VI Secretion  
1083 Systems Found in Bacteria.” *Environmental Microbiology* 17 (7): 2196–2202.
- 1084 Liu, Ya, Zheng Zhang, Feng Wang, Dan-Dan Li, and Yue-Zhong Li. 2020. “Identification  
1085 of Type VI Secretion System Toxic Effectors Using Adaptors as Markers.”  
1086 *Computational and Structural Biotechnology Journal* 18 (November): 3723–33.
- 1087 Li, Weizhong, and Adam Godzik. 2006. “Cd-Hit: A Fast Program for Clustering and  
1088 Comparing Large Sets of Protein or Nucleotide Sequences.” *Bioinformatics* 22  
1089 (13): 1658–59.
- 1090 Logan, Savannah L., Jacob Thomas, Jinyuan Yan, Ryan P. Baker, Drew S. Shields,  
1091 Joao B. Xavier, Brian K. Hammer, and Raghuvier Parthasarathy. 2018. “The *Vibrio*  
1092 *Cholerae* Type VI Secretion System Can Modulate Host Intestinal Mechanics to  
1093 Displace Gut Bacterial Symbionts.” *Proceedings of the National Academy of*  
1094 *Sciences of the United States of America* 115 (16): E3779–87.
- 1095 Mahenthalingam, Eshwar, Teresa A. Urban, and Joanna B. Goldberg. 2005. “The  
1096 Multifarious, Multireplicon Burkholderia Cepacia Complex.” *Nature Reviews*.  
1097 *Microbiology* 3 (2): 144–56.
- 1098 Ma, Jiale, Zihao Pan, Jinhu Huang, Min Sun, Chengping Lu, and Huochun Yao. 2017.  
1099 “The Hcp Proteins Fused with Diverse Extended-Toxin Domains Represent a Novel  
1100 Pattern of Antibacterial Effectors in Type VI Secretion Systems.” *Virulence* 8 (7):  
1101 1189–1202.
- 1102 Ma, Jiale, Min Sun, Wenyang Dong, Zihao Pan, Chengping Lu, and Huochun Yao.  
1103 2017. “PAAR-Rhs Proteins Harbor Various C-Terminal Toxins to Diversify the  
1104 Antibacterial Pathways of Type VI Secretion Systems.” *Environmental Microbiology*  
1105 19 (1): 345–60.
- 1106 Marchler-Bauer, Aron, Myra K. Derbyshire, Noreen R. Gonzales, Shennan Lu, Farideh  
1107 Chitsaz, Lewis Y. Geer, Renata C. Geer, et al. 2015. “CDD: NCBI’s Conserved  
1108 Domain Database.” *Nucleic Acids Research* 43 (Database issue): D222–26.
- 1109 Markowitz, Victor M., I-Min A. Chen, Krishna Palaniappan, Ken Chu, Ernest Szeto, Yuri  
1110 Grechkin, Anna Ratner, et al. 2012. “IMG: The Integrated Microbial Genomes  
1111 Database and Comparative Analysis System.” *Nucleic Acids Research* 40  
1112 (Database issue): D115–22.
- 1113 Mosquito, Susan, Iris Bertani, Danilo Licastro, Stéphane Compant, Michael P. Myers,  
1114 Estefanía Hinarejos, Asaf Levy, and Vittorio Venturi. 2020. “In Planta Colonization  
1115 and Role of T6SS in Two Rice *Kosakonia* Endophytes.” *Molecular Plant-Microbe*  
1116 *Interactions: MPMI* 33 (2): 349–63.
- 1117 Nolan, Laura M., Amy K. Cain, Thomas Clamens, R. Christopher D. Furniss, Eleni  
1118 Manoli, Maria A. Sainz-Polo, Gordon Dougan, et al. 2021. “Identification of Tse8 as  
1119 a Type VI Secretion System Toxin from *Pseudomonas Aeruginosa* That Targets  
1120 the Bacterial Transamidosome to Inhibit Protein Synthesis in Prey Cells.” *Nature*

- 1121 *Microbiology* 6 (9): 1199–1210.
- 1122 Pedregosa, Fabian, Gaël Varoquaux, Alexandre Gramfort, Vincent Michel, Bertrand  
1123 Thirion, Olivier Grisel, Mathieu Blondel, et al. 2011. “Scikit-Learn: Machine Learning  
1124 in Python.” *The Journal of Machine Learning Research* 12: 2825–30.
- 1125 Piñeiro, César, José M. Abuín, and Juan C. Pichel. 2020. “Very Fast Tree: Speeding up  
1126 the Estimation of Phylogenies for Large Alignments through Parallelization and  
1127 Vectorization Strategies.” *Bioinformatics* 36 (17): 4658–59.
- 1128 Puigbò, Pere, Yuri I. Wolf, and Eugene V. Koonin. 2009. “Search for a ‘Tree of Life’ in  
1129 the Thicket of the Phylogenetic Forest.” *Journal of Biology* 8 (6): 59.
- 1130 Pukatzki, Stefan, Amy T. Ma, Andrew T. Revel, Derek Sturtevant, and John J.  
1131 Mekalanos. 2007. “Type VI Secretion System Translocates a Phage Tail Spike-like  
1132 Protein into Target Cells Where It Cross-Links Actin.” *Proceedings of the National  
1133 Academy of Sciences of the United States of America* 104 (39): 15508–13.
- 1134 Pukatzki, Stefan, Amy T. Ma, Derek Sturtevant, Bryan Krastins, David Sarracino,  
1135 William C. Nelson, John F. Heidelberg, and John J. Mekalanos. 2006.  
1136 “Identification of a Conserved Bacterial Protein Secretion System in *Vibrio Cholerae*  
1137 Using the Dictyostelium Host Model System.” *Proceedings of the National  
1138 Academy of Sciences of the United States of America* 103 (5): 1528–33.
- 1139 Quentin, Dennis, Shehryar Ahmad, Premy Shanthamoorthy, Joseph D. Mougous, John  
1140 C. Whitney, and Stefan Raunser. 2018. “Mechanism of Loading and Translocation  
1141 of Type VI Secretion System Effector Tse6.” *Nature Microbiology* 3 (10): 1142–52.
- 1142 Repizo, Guillermo D., Martín Espariz, Joana L. Seravalle, and Suzana P. Salcedo.  
1143 2019. “Bioinformatic Analysis of the Type VI Secretion System and Its Potential  
1144 Toxins in the *Acinetobacter* Genus.” *Frontiers in Microbiology* 10 (November):  
1145 2519.
- 1146 Robinson, Luca, Janie Liaw, Zahra Omole, Dong Xia, Arnoud H. M. van Vliet, Nicolae  
1147 Corcionivoschi, Abderrahman Hachani, and Ozan Gundogdu. 2021. “Bioinformatic  
1148 Analysis of the *Campylobacter* Jejuni Type VI Secretion System and Effector  
1149 Prediction.” *Frontiers in Microbiology* 12 (June): 694824.
- 1150 Russell, Alistair B., Michele LeRoux, Krisztina Hathazi, Danielle M. Agnello, Takahiko  
1151 Ishikawa, Paul A. Wiggins, Sun Nyunt Wai, and Joseph D. Mougous. 2013.  
1152 “Diverse Type VI Secretion Phospholipases Are Functionally Plastic Antibacterial  
1153 Effectors.” *Nature* 496 (7446): 508–12.
- 1154 Russell, Alistair B., Pragma Singh, Mitchell Brittnacher, Nhat Khai Bui, Rachel D. Hood,  
1155 Mike A. Carl, Danielle M. Agnello, et al. 2012. “A Widespread Bacterial Type VI  
1156 Secretion Effector Superfamily Identified Using a Heuristic Approach.” *Cell Host &  
1157 Microbe* 11 (5): 538–49.
- 1158 Russell, Alistair B., Aaron G. Wexler, Brittany N. Harding, John C. Whitney, Alan J.  
1159 Bohn, Young Ah Goo, Bao Q. Tran, et al. 2014. “A Type VI Secretion-Related  
1160 Pathway in Bacteroidetes Mediates Interbacterial Antagonism.” *Cell Host & Microbe*  
1161 16 (2): 227–36.
- 1162 Salomon, Dor, Lisa N. Kinch, David C. Trudgian, Xiaofeng Guo, John A. Klimko, Nick V.  
1163 Grishin, Hamid Mirzaei, and Kim Orth. 2014. “Marker for Type VI Secretion System  
1164 Effectors.” *Proceedings of the National Academy of Sciences of the United States  
1165 of America* 111 (25): 9271–76.
- 1166 Sievers, Fabian, Andreas Wilm, David Dineen, Toby J. Gibson, Kevin Karplus,

- 1167 Weizhong Li, Rodrigo Lopez, et al. 2011. “Fast, Scalable Generation of High-  
1168 Quality Protein Multiple Sequence Alignments Using Clustal Omega.” *Molecular*  
1169 *Systems Biology* 7 (October): 539.
- 1170 Singh, Lavan, M. P. Cariappa, and Mandeep Kaur. 2016. “Klebsiella Oxytoca: An  
1171 Emerging Pathogen?” *Armed Forces Medical Journal, India* 72 (Suppl 1): S59–61.
- 1172 Söding, Johannes, Andreas Biegert, and Andrei N. Lupas. 2005. “The HHpred  
1173 Interactive Server for Protein Homology Detection and Structure Prediction.”  
1174 *Nucleic Acids Research* 33 (Web Server issue): W244–48.
- 1175 Speare, Lauren, Andrew G. Cecere, Kirsten R. Guckes, Stephanie Smith, Michael S.  
1176 Wollenberg, Mark J. Mandel, Tim Miyashiro, and Alecia N. Septer. 2018. “Bacterial  
1177 Symbionts Use a Type VI Secretion System to Eliminate Competitors in Their  
1178 Natural Host.” *Proceedings of the National Academy of Sciences of the United*  
1179 *States of America* 115 (36): E8528–37.
- 1180 Toska, Jonida, Brian T. Ho, and John J. Mekalanos. 2018. “Exopolysaccharide Protects  
1181 *Vibrio Cholerae* from Exogenous Attacks by the Type 6 Secretion System.”  
1182 *Proceedings of the National Academy of Sciences of the United States of America*  
1183 115 (31): 7997–8002.
- 1184 Unterweger, Daniel, Benjamin Kostiuk, Rina Ötjengerdes, Ashley Wilton, Laura Diaz-  
1185 Satizabal, and Stefan Pukatzki. 2015. “Chimeric Adaptor Proteins Translocate  
1186 Diverse Type VI Secretion System Effectors in *Vibrio Cholerae*.” *The EMBO*  
1187 *Journal* 34 (16): 2198–2210.
- 1188 Unterweger, Daniel, Benjamin Kostiuk, and Stefan Pukatzki. 2017. “Adaptor Proteins of  
1189 Type VI Secretion System Effectors.” *Trends in Microbiology* 25 (1): 8–10.
- 1190 Vettiger, Andrea, and Marek Basler. 2016. “Type VI Secretion System Substrates Are  
1191 Transferred and Reused among Sister Cells.” *Cell* 167 (1): 99–110.e12.
- 1192 Wang, Jiawei, Bingjiao Yang, André Leier, Tatiana T. Marquez-Lago, Morihito  
1193 Hayashida, Andrea Rucker, Yanju Zhang, et al. 2018. “Bastion6: A Bioinformatics  
1194 Approach for Accurate Prediction of Type VI Secreted Effectors.” *Bioinformatics* 34  
1195 (15): 2546–55.
- 1196 Wang, Jing, Maj Brodmann, and Marek Basler. 2019. “Assembly and Subcellular  
1197 Localization of Bacterial Type VI Secretion Systems.” *Annual Review of*  
1198 *Microbiology* 73 (September): 621–38.
- 1199 Whitney, John C., Seemay Chou, Alistair B. Russell, Jacob Biboy, Taylor E. Gardiner,  
1200 Michael A. Ferrin, Mitchell Brittnacher, Waldemar Vollmer, and Joseph D.  
1201 Mougous. 2013. “Identification, Structure, and Function of a Novel Type VI  
1202 Secretion Peptidoglycan Glycoside Hydrolase Effector-Immunity Pair.” *The Journal*  
1203 *of Biological Chemistry* 288 (37): 26616–24.
- 1204 Whitney, John C., Dennis Quentin, Shin Sawai, Michele LeRoux, Brittany N. Harding,  
1205 Hannah E. Ledvina, Bao Q. Tran, et al. 2015. “An Interbacterial NAD(P)(+)  
1206 Glycohydrolase Toxin Requires Elongation Factor Tu for Delivery to Target Cells.”  
1207 *Cell* 163 (3): 607–19.
- 1208 Wood, Thomas E., Sophie A. Howard, Andreas Förster, Laura M. Nolan, Eleni Manoli,  
1209 Nathan P. Bullen, Hamish C. L. Yau, et al. 2019. “The *Pseudomonas Aeruginosa*  
1210 T6SS Delivers a Periplasmic Toxin That Disrupts Bacterial Cell Morphology.” *Cell*  
1211 *Reports* 29 (1): 187–201.e7.
- 1212 Xu, Shuangbin, Zehan Dai, Pingfan Guo, Xiacong Fu, Shanshan Liu, Lang Zhou,

- 1213 Wenli Tang, et al. 2021. “ggtreeExtra: Compact Visualization of Richly Annotated  
1214 Phylogenetic Data.” *Molecular Biology and Evolution* 38 (9): 4039–42.
- 1215 Yang, Xiaobing, Junfeng Pan, Yao Wang, and Xihui Shen. 2018. “Type VI Secretion  
1216 Systems Present New Insights on Pathogenic *Yersinia*.” *Frontiers in Cellular and*  
1217 *Infection Microbiology* 8 (July): 260.
- 1218 Yu, Guangchuang, David K. Smith, Huachen Zhu, Yi Guan, and Tommy Tsan-Yuk Lam.  
1219 2017. “Ggtree : An R Package for Visualization and Annotation of Phylogenetic  
1220 Trees with Their Covariates and Other Associated Data.” *Methods in Ecology and*  
1221 *Evolution / British Ecological Society* 8 (1): 28–36.
- 1222 Zhang, Dapeng, Robson F. de Souza, Vivek Anantharaman, Lakshminarayan M. Iyer,  
1223 and L. Aravind. 2012. “Polymorphic Toxin Systems: Comprehensive  
1224 Characterization of Trafficking Modes, Processing, Mechanisms of Action,  
1225 Immunity and Ecology Using Comparative Genomics.” *Biology Direct* 7 (1): 18.
- 1226

**A**

Phylum

- Acidobacteria
- Actinobacteria
- Aquificae
- Armatimonadetes
- Bacteroidetes
- Caldisevica
- Calditrichaeota
- Chlamydiae
- Chlorobi
- Chloroflexi
- Chrysiogenetes
- Coprothermobacterota
- Cyanobacteria
- Deferribacteres
- Deinococcus-Thermus
- Dictyoglomi
- Elusimicrobia
- Fibrobacteres
- Firmicutes
- Fusobacteria
- Gemmatimonadetes
- Ignavibacteriae
- Kiritimatiellaeota
- Lentisphaerae
- Planctomycetes
- Proteobacteria
- Spirochaetes
- Synergistetes
- Thermotogae
- Verrucomicrobia

Fraction of T6SS+ genomes per family

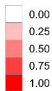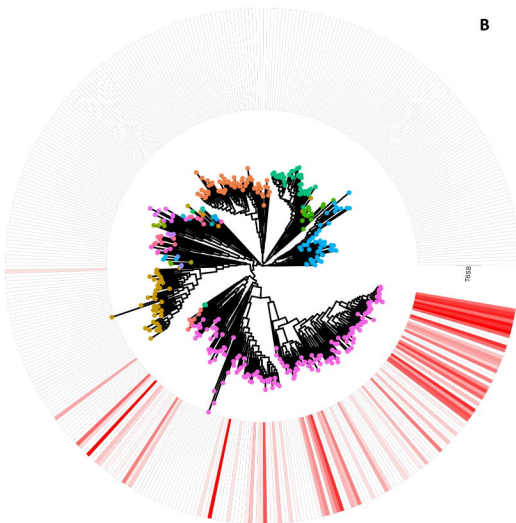**B**

Gammaproteobacteria  
Betaproteobacteria  
Alphaproteobacteria  
Deltaproteobacteria  
Epsilonproteobacteria

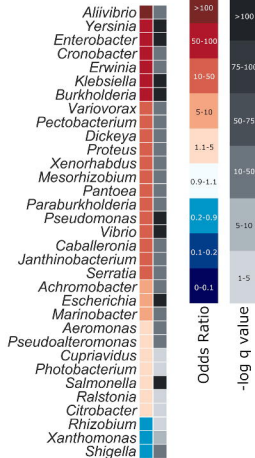



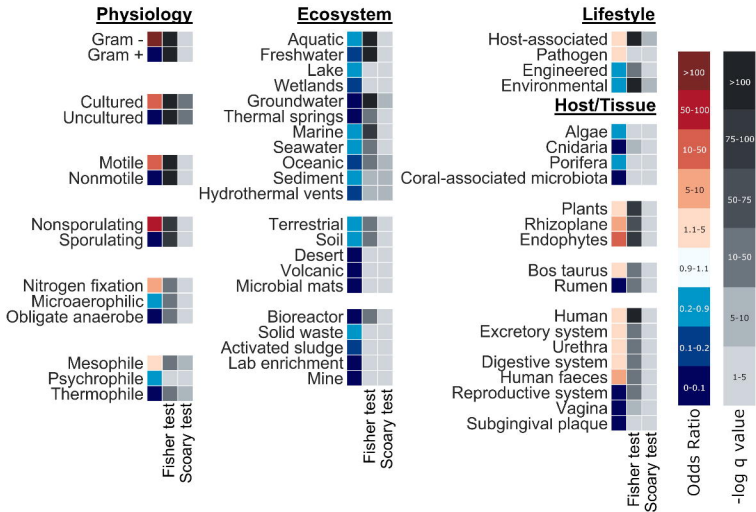

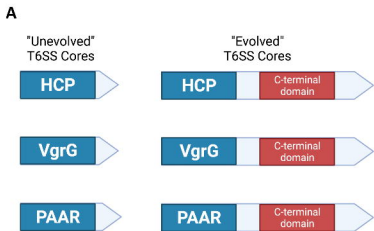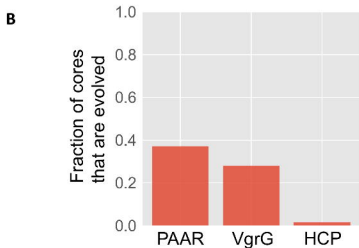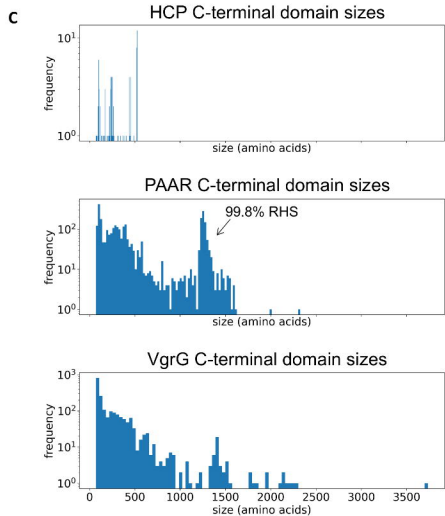

A

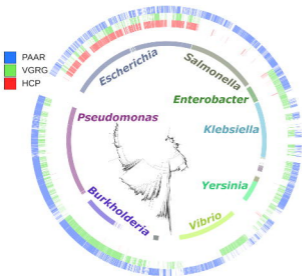

B

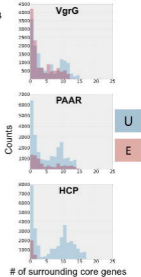

VgrG

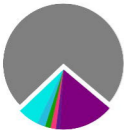

PAAR

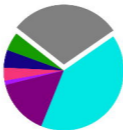

HCP

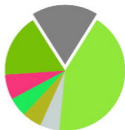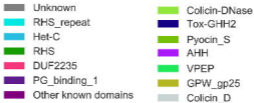

**A**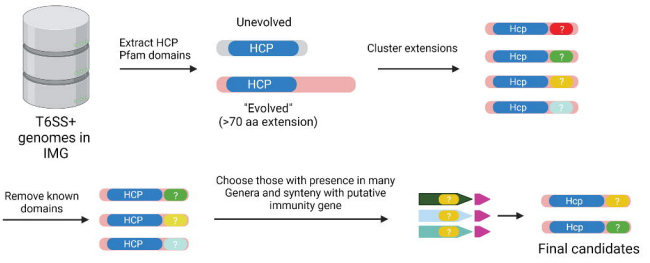**B**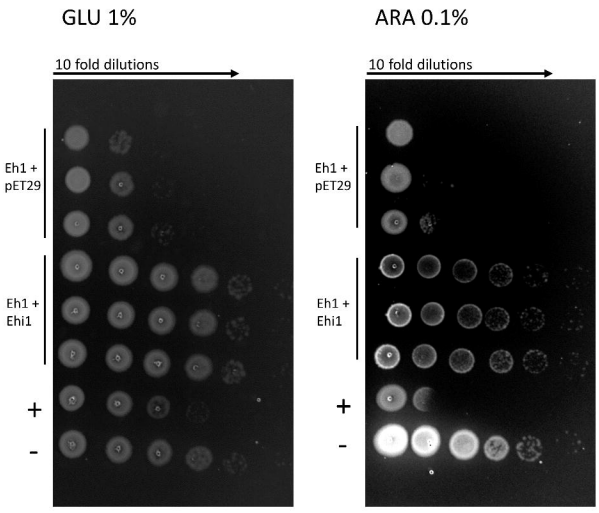

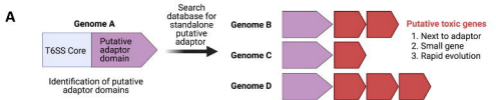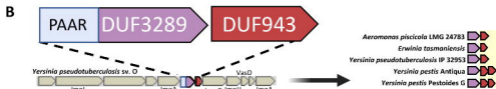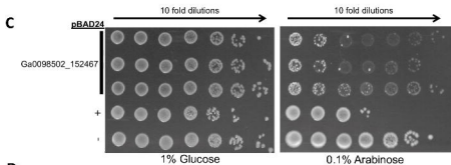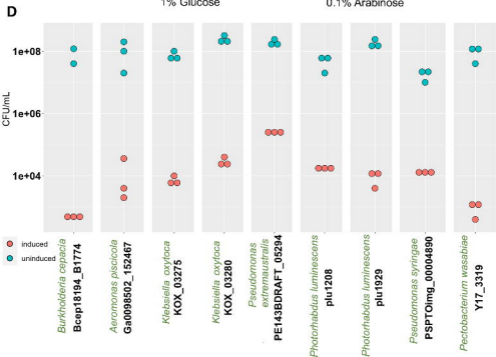

Source: https://www.biorxiv.org/content/10.1101/2021.10.07.463556v1.full.pdf
